# Supplementary material for: Mitochondria-targeted betulinic and ursolic acid derivatives: synthesis and anticancer activity
Source: PubMed Central journal article supplement — Medchemcomm. 2017 Sep 13;8(10):1934–45. doi: 10.1039/c7md00248c (PMC6072465; doi:10.1039/c7md00248c), 2017-09-13

## Mitochondria-targeted betulinic and ursolic acids derivatives: synthesis and anticancer activity

Darya A. Nedopekina,<sup>a</sup> Rinat R. Gubaidullin,<sup>a</sup> Victor N. Odinov,<sup>a</sup> Polina V. Maximchik,<sup>b</sup> Boris Zhivotovsky,<sup>b,c</sup> Yuriy P. Bel'skii,<sup>d</sup> Veniamin A. Khazanov,<sup>d</sup> Arina V. Manuylova,<sup>d</sup> Vladimir Gogvadze,<sup>\*b,c</sup> and Anna Yu. Spivak<sup>\*a</sup>

<sup>a</sup>Institute of Petrochemistry and Catalysis, Russian Academy of Sciences, 141 prosp. Oktyabrya, Ufa 450075, Russian Federation.

Email: spivak.ink@gmail.com

<sup>b</sup>Faculty of Fundamental Medicine, MV Lomonosov Moscow State University, 11999 Moscow, Russia. Email: vlad\_gogvadze@rambler.ru

<sup>c</sup>Division of Toxicology, Institute of Environmental Medicine, Karolinska Institutet, Box 210, 17177 Stockholm, Sweden

<sup>d</sup>Innovative Pharmacology Research (IPHAR), 79/4 Elizarova, Tomsk 634021, Russian Federation

4-Bromobutyl-3 $\beta$ -hydroxylup-20(29)-en-28-oate **1**  
<sup>1</sup>H NMR spectra (CDCl<sub>3</sub>)

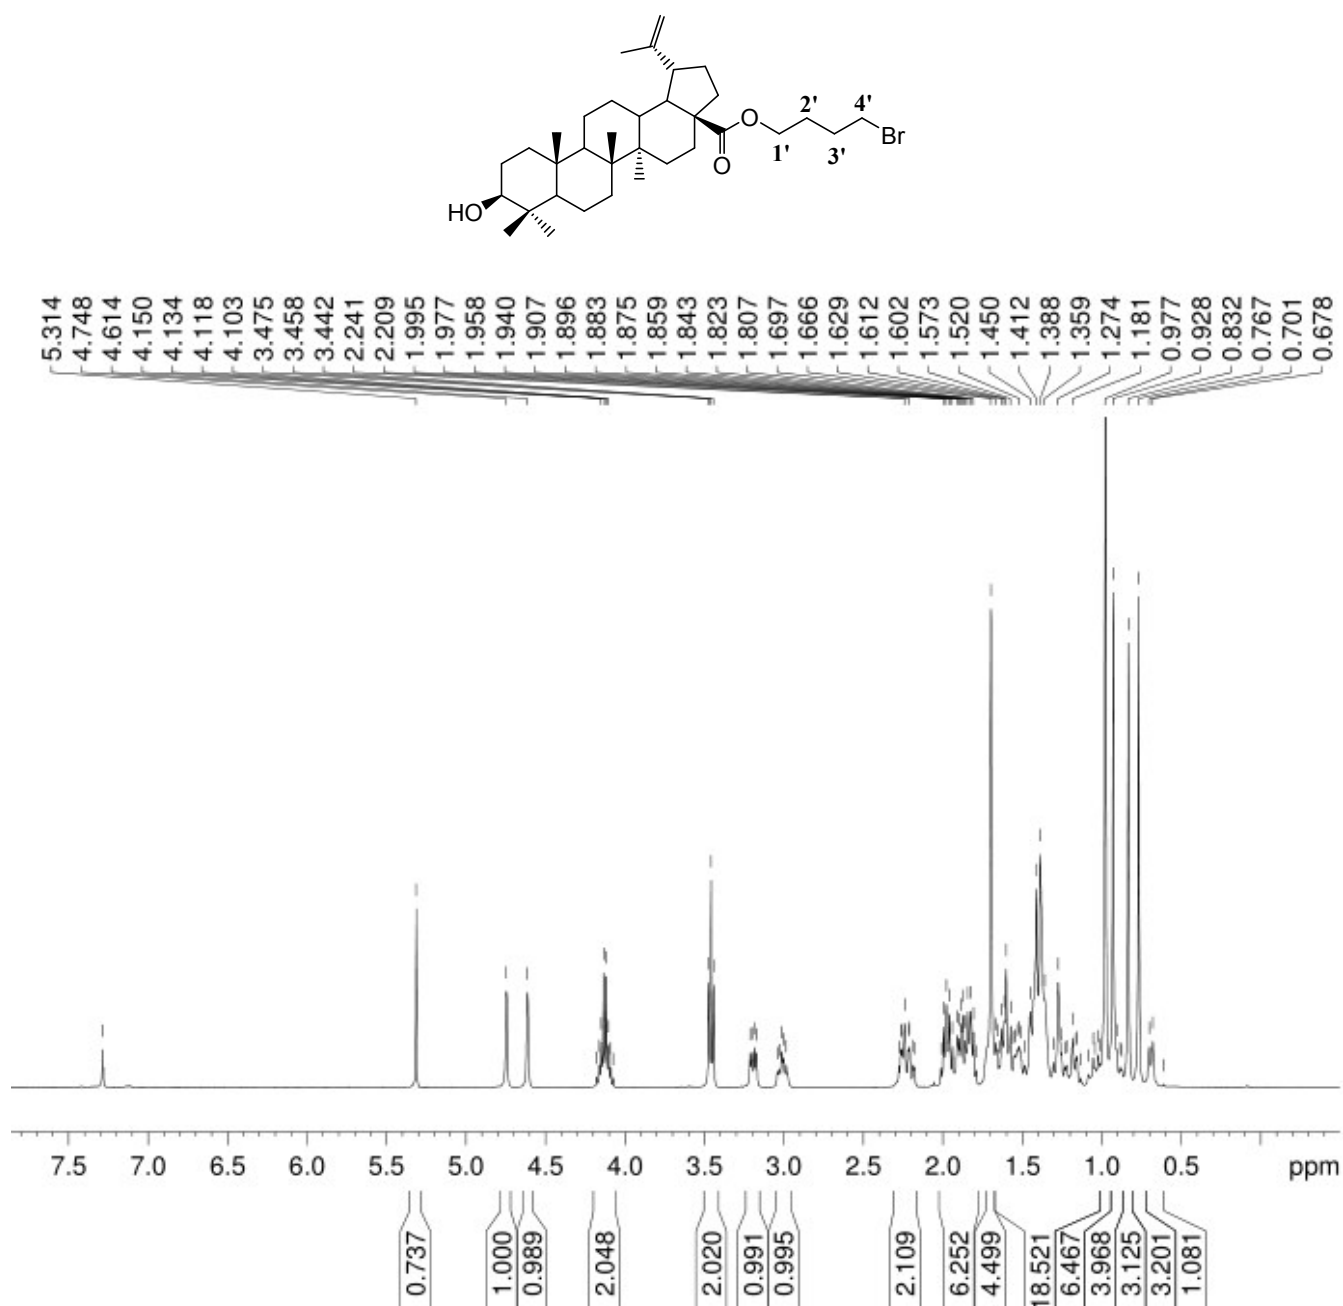

4-Bromobutyl-3 $\beta$ -hydroxylup-20(29)-en-28-oate **1**  
<sup>13</sup>C NMR spectra (CDCl<sub>3</sub>)

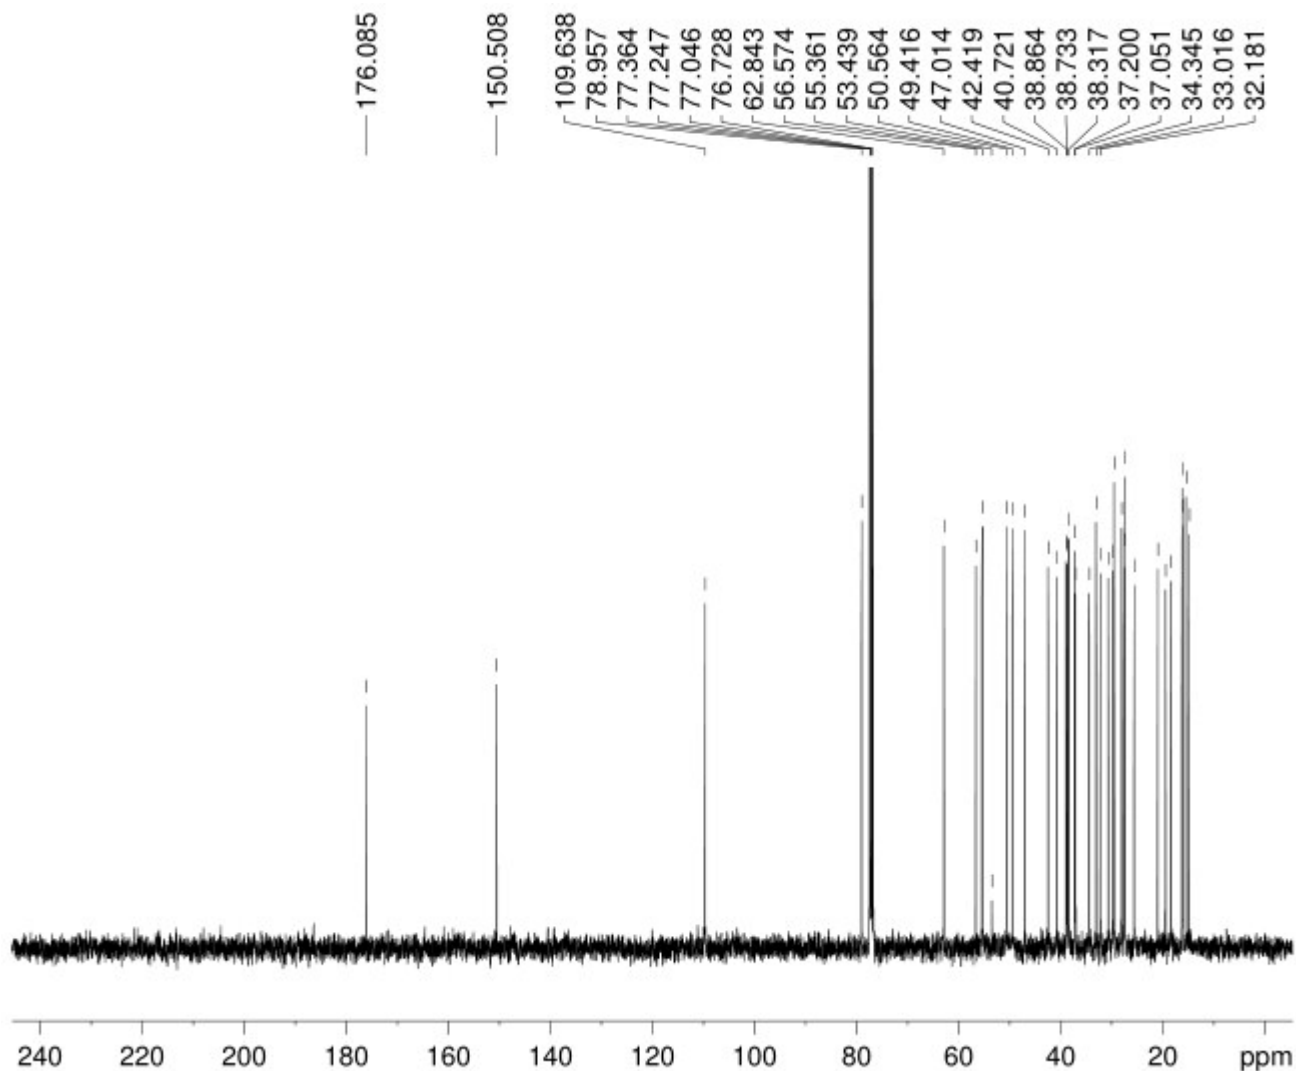

8'-Bromo-3',6'-dioxaoctan-1'-yl-3 $\beta$ -acetoxylup-20(29)-en-28-oate **2**

<sup>1</sup>H NMR spectra (CDCl<sub>3</sub>)

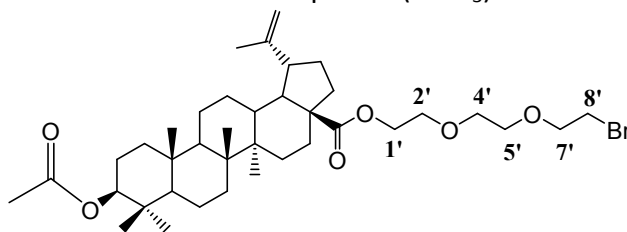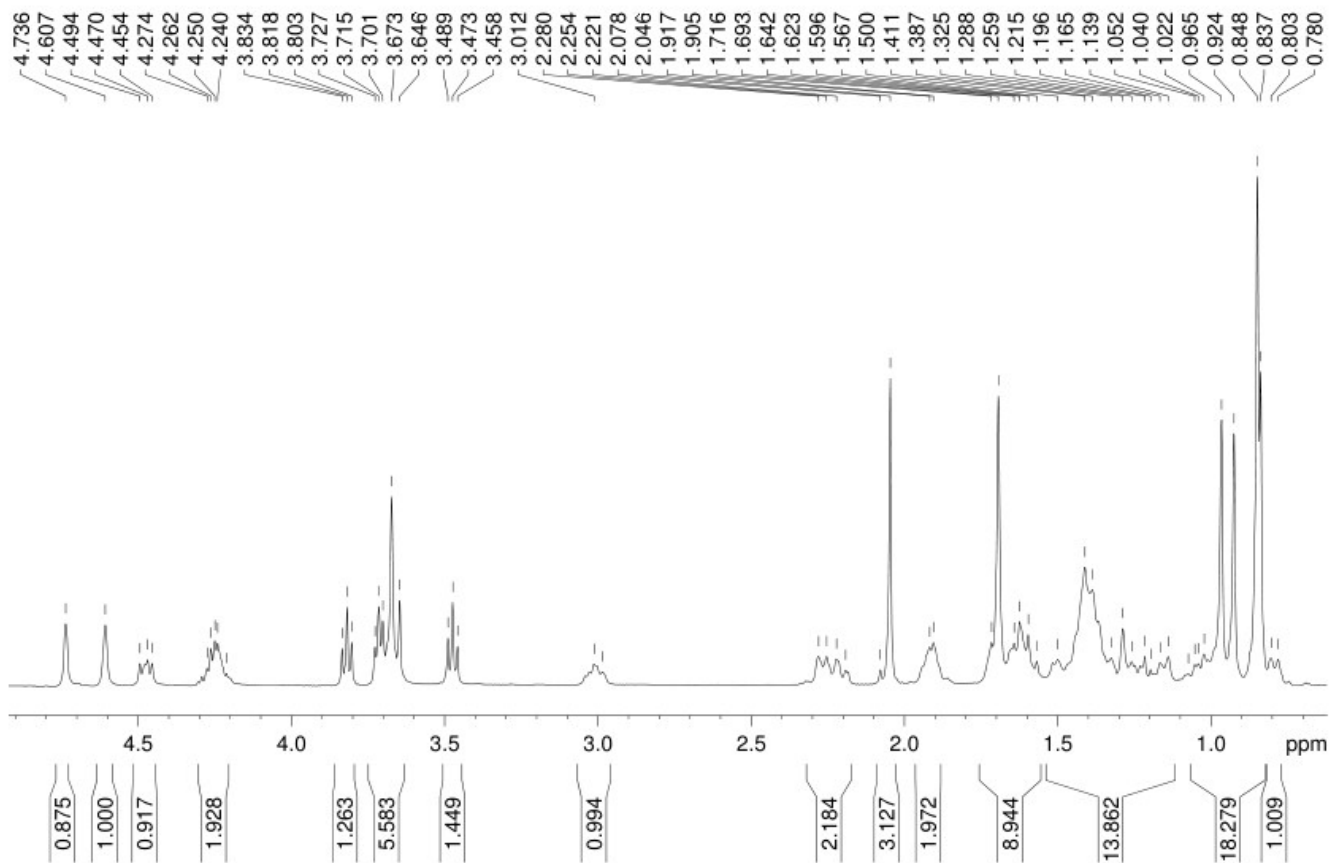

8'-Bromo-3',6'-dioxaoctan-1'-yl-3 $\beta$ -acetoxylup-20(29)-en-28-oate **2**  
 $^{13}\text{C}$  NMR spectra ( $\text{CDCl}_3$ )

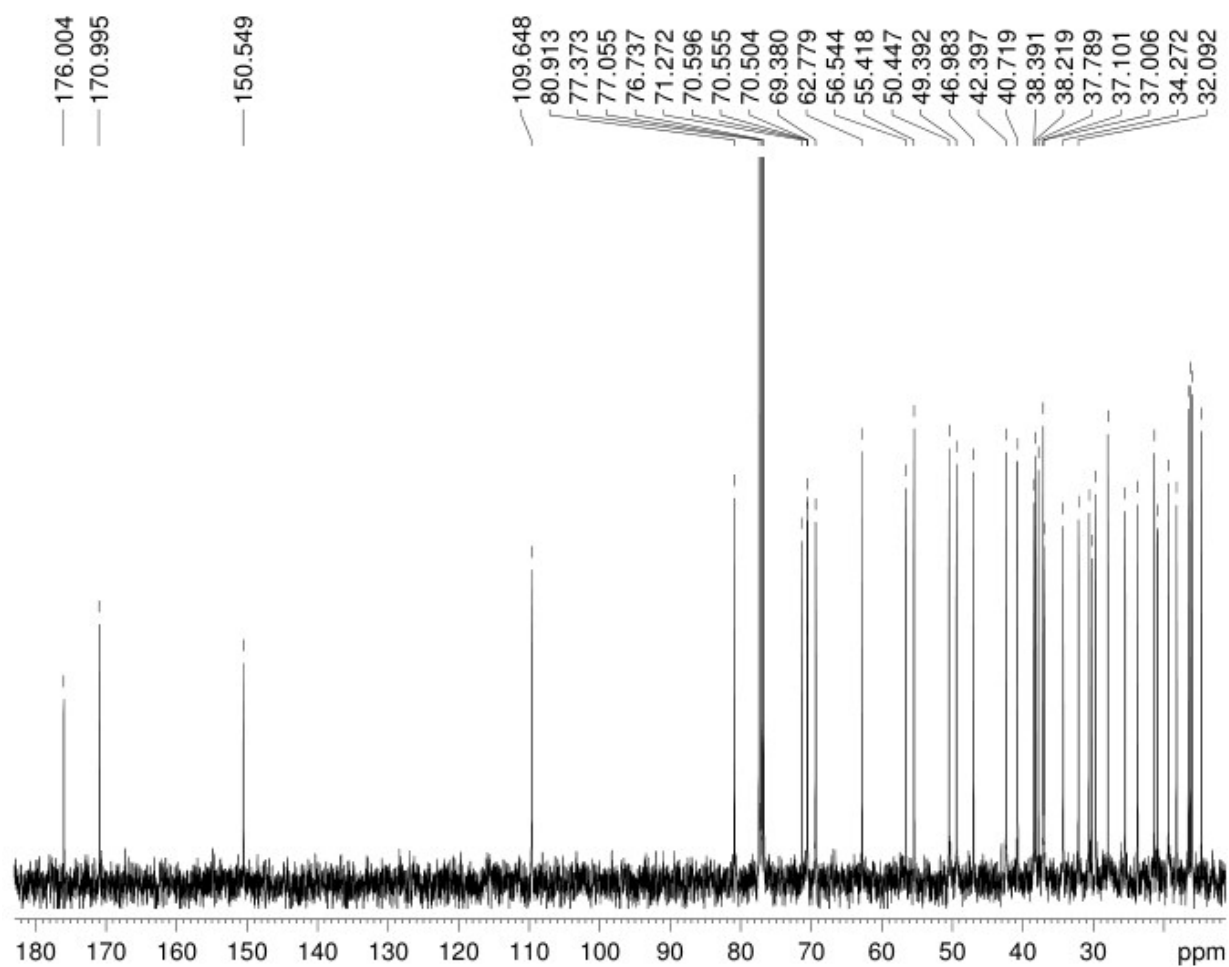

8'-Tosyl-3',6'-dioxaoctan-1'-yl- $\beta$ -acetoxylup-20(29)-en-28-oate **3**  
 $^1\text{H}$  NMR spectra ( $\text{CDCl}_3$ )

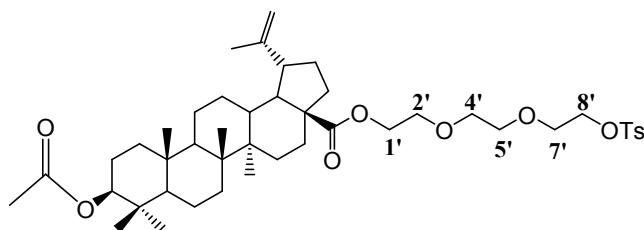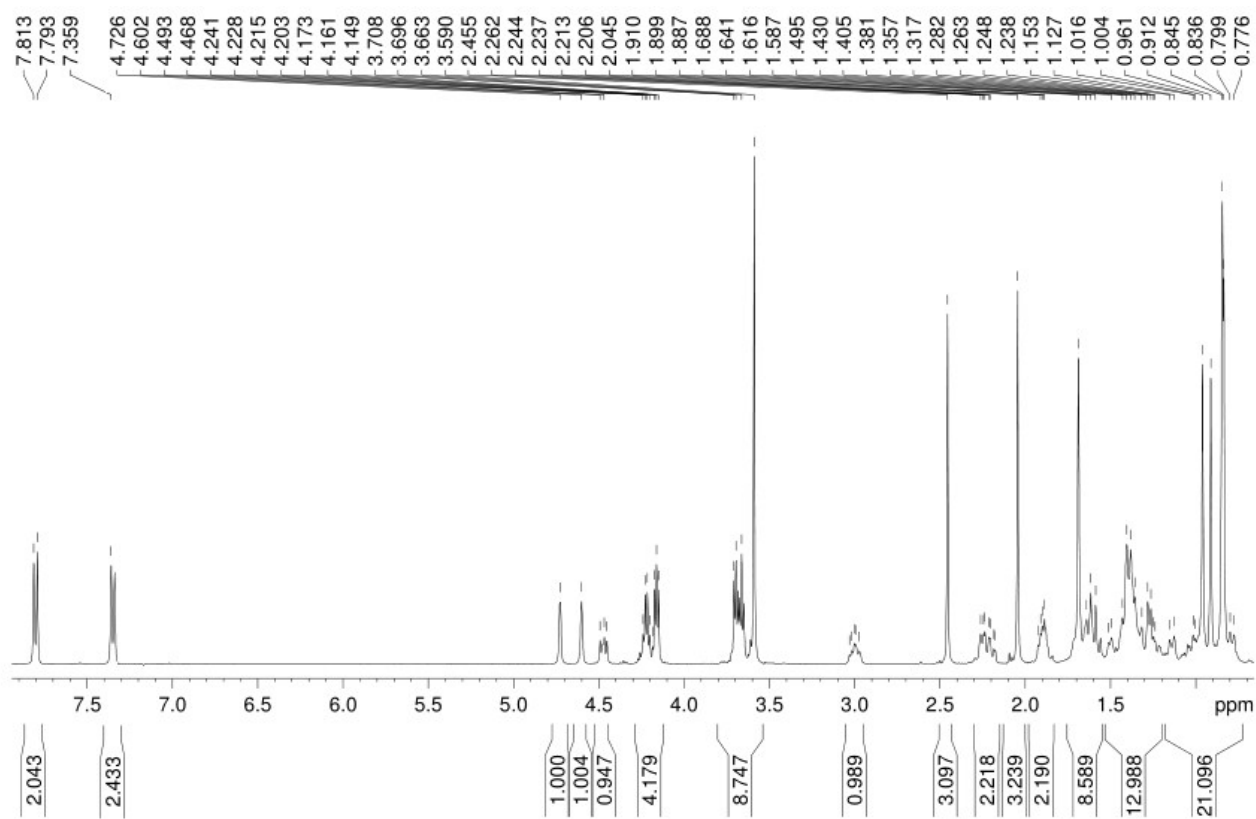

8'-Tosyl-3',6'-dioxaoctan-1'-yl-3 $\beta$ -acetoxylup-20(29)-en-28-oate **3**  
 $^{13}\text{C}$  NMR spectra ( $\text{CDCl}_3$ )

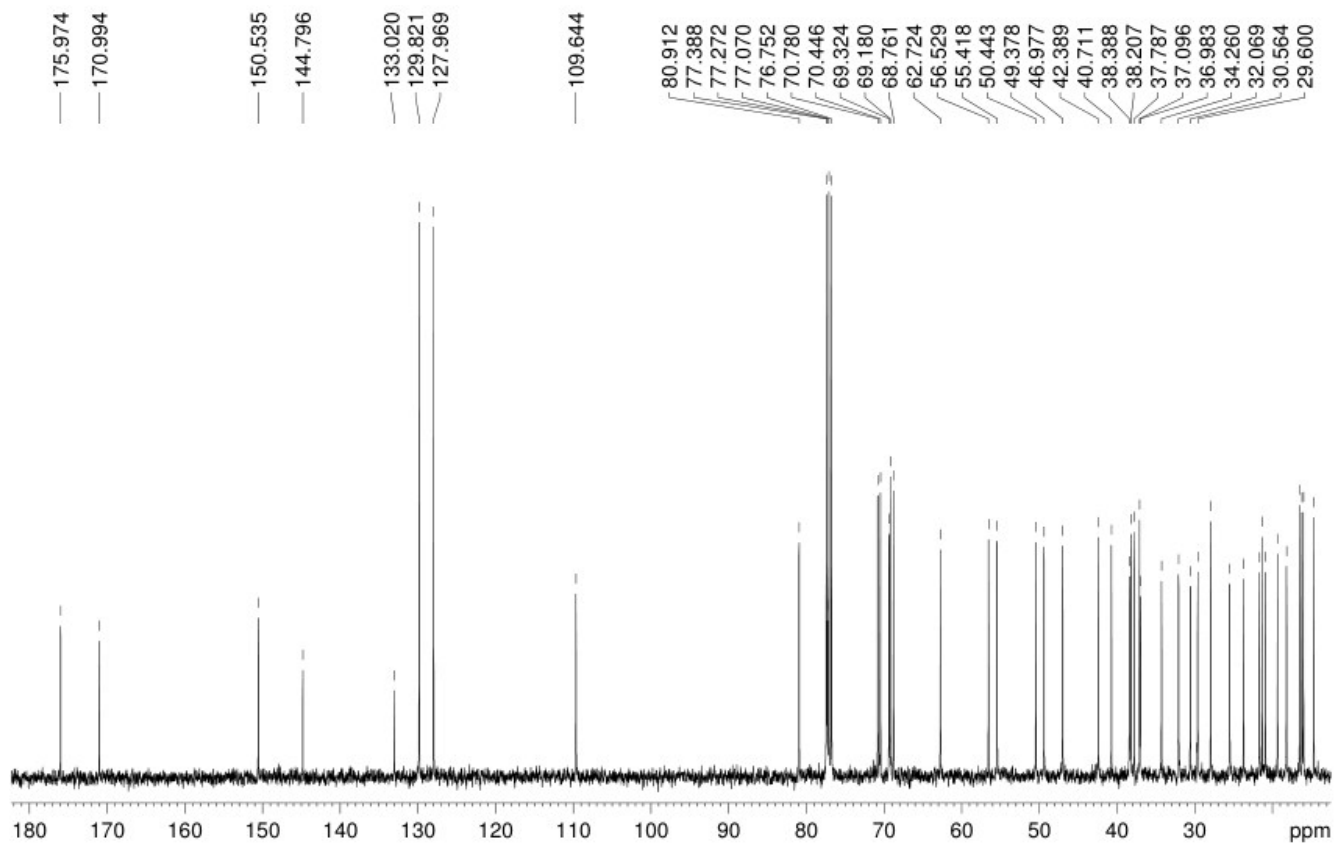

8'-Bromo-3',6'-dioxaoctan-1'-yl-3 $\beta$ -hydroxylup-20(29)-en-28-oate **4**  
 $^1\text{H}$  NMR spectra ( $\text{CDCl}_3$ )

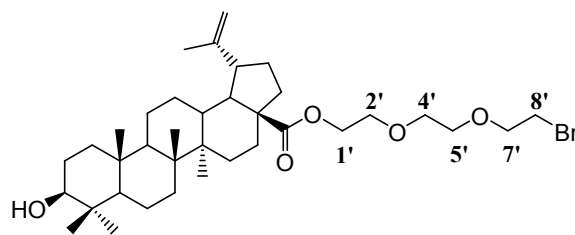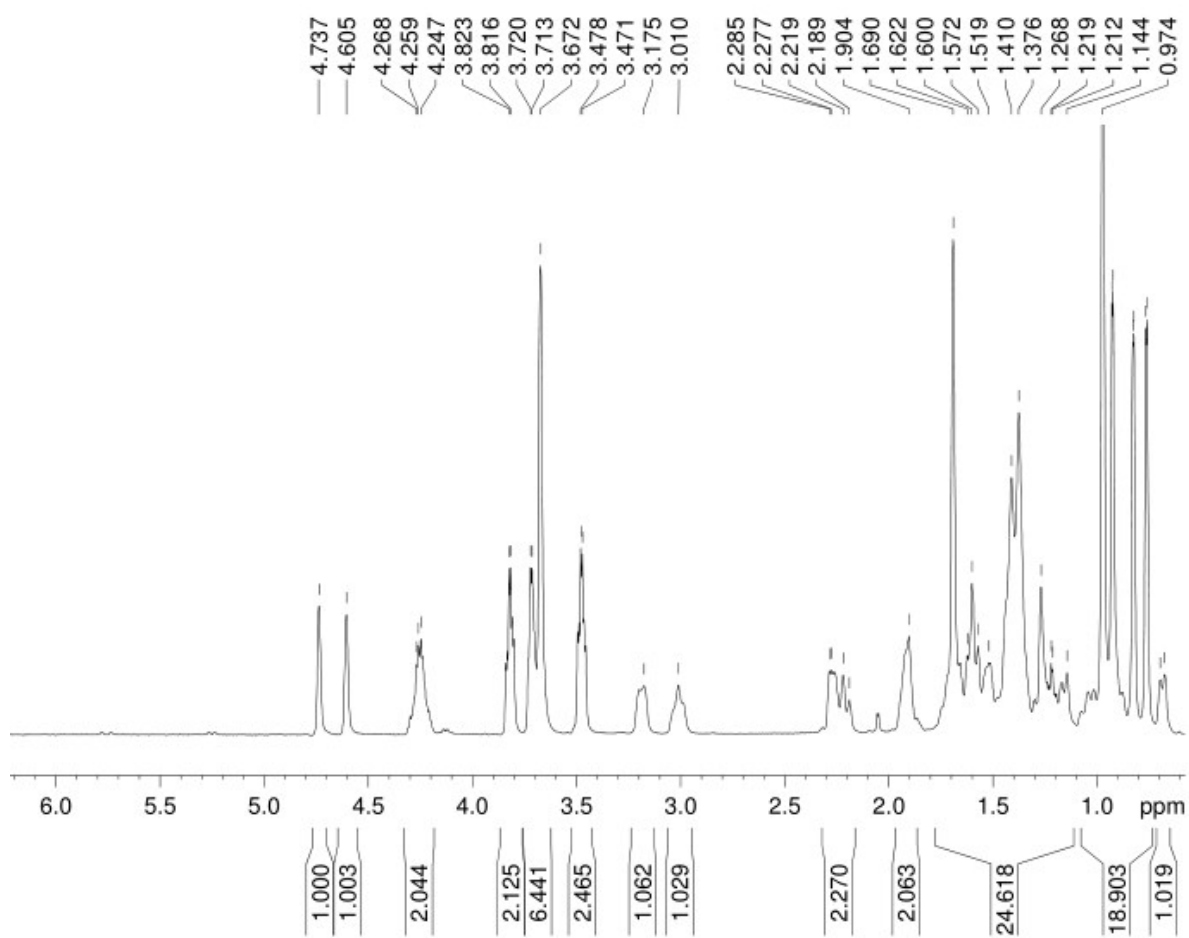

8'-Bromo-3',6'-dioxaoctan-1'-yl-3 $\beta$ -hydroxylup-20(29)-en-28-oate **4**  
 $^{13}\text{C}$  NMR spectra ( $\text{CDCl}_3$ )

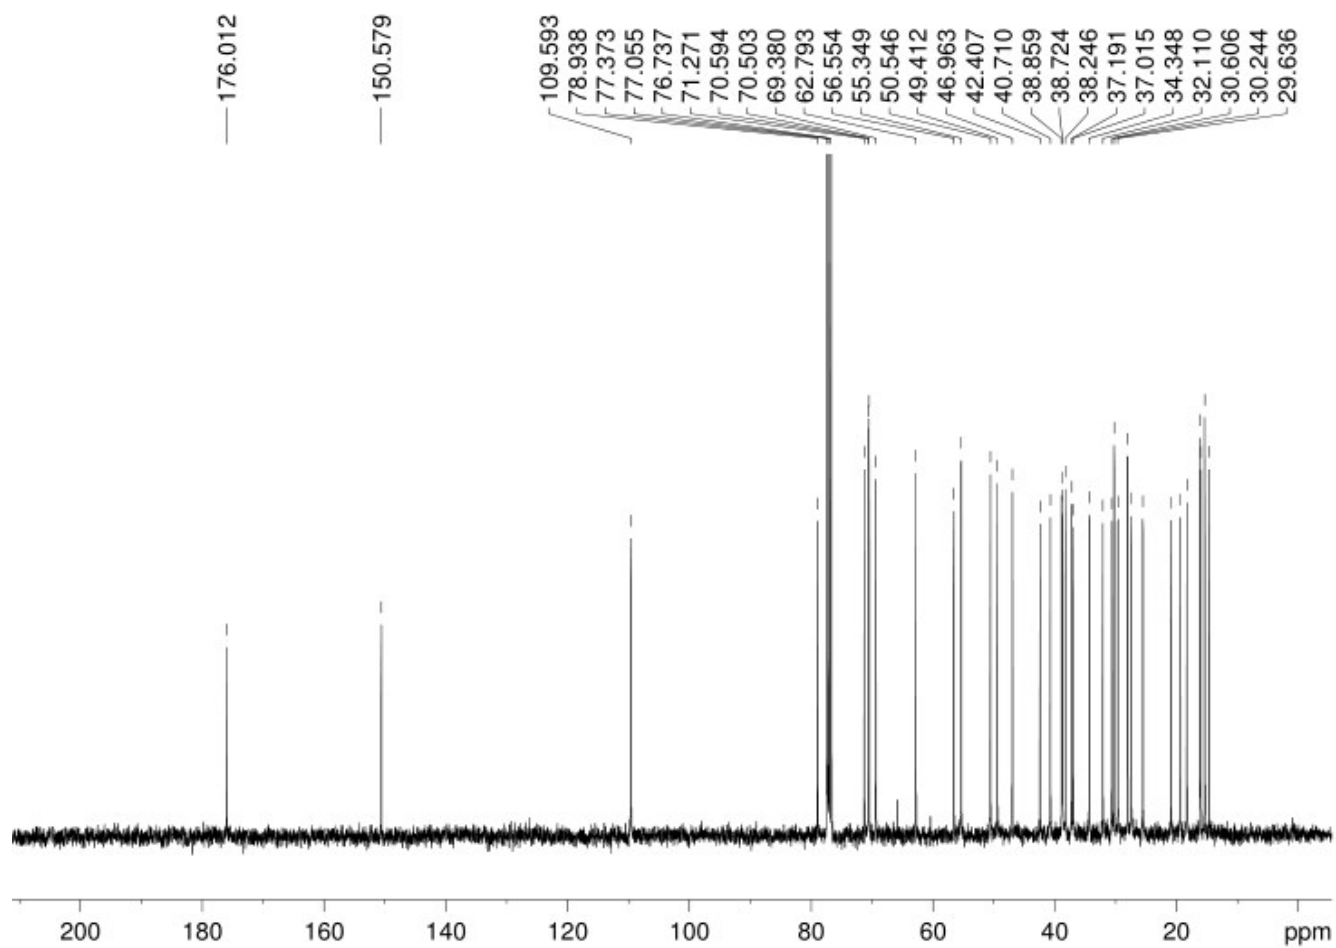



4-Bromobutyl-3 $\beta$ -hydroxyurs-12en-28-oate **11**  
 $^1\text{H}$  NMR spectra ( $\text{CDCl}_3$ )

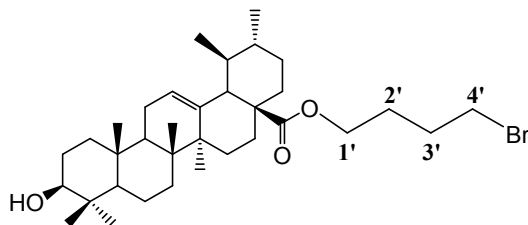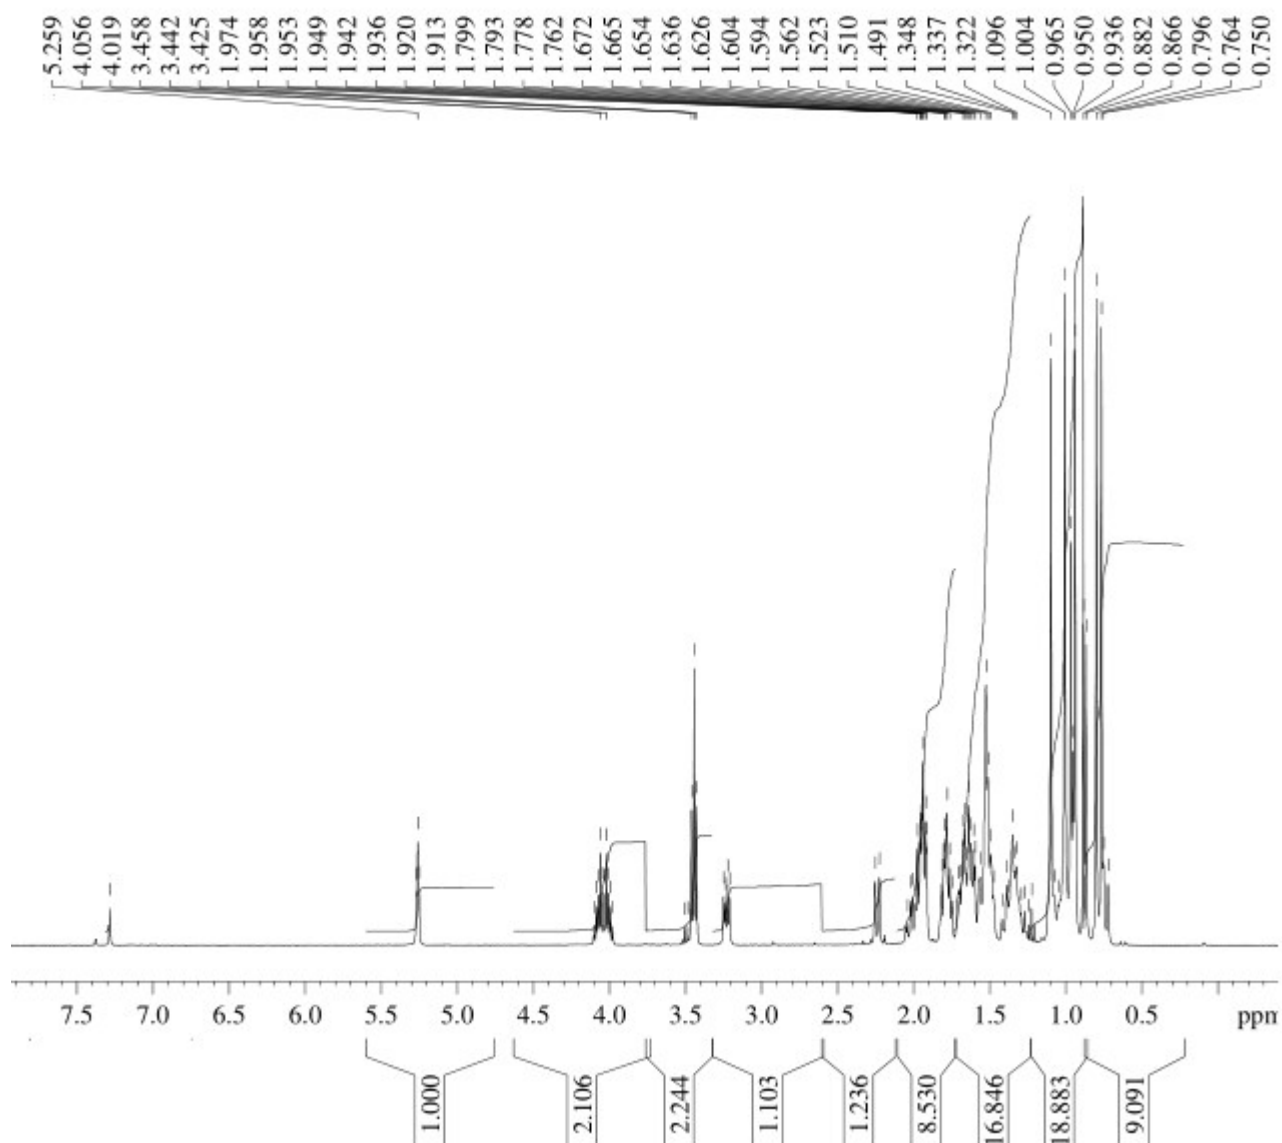

4-Bromobutyl-3 $\beta$ -hydroxyurs-12en-28-oate **11**  
 $^{13}\text{C}$  NMR spectra ( $\text{CDCl}_3$ )

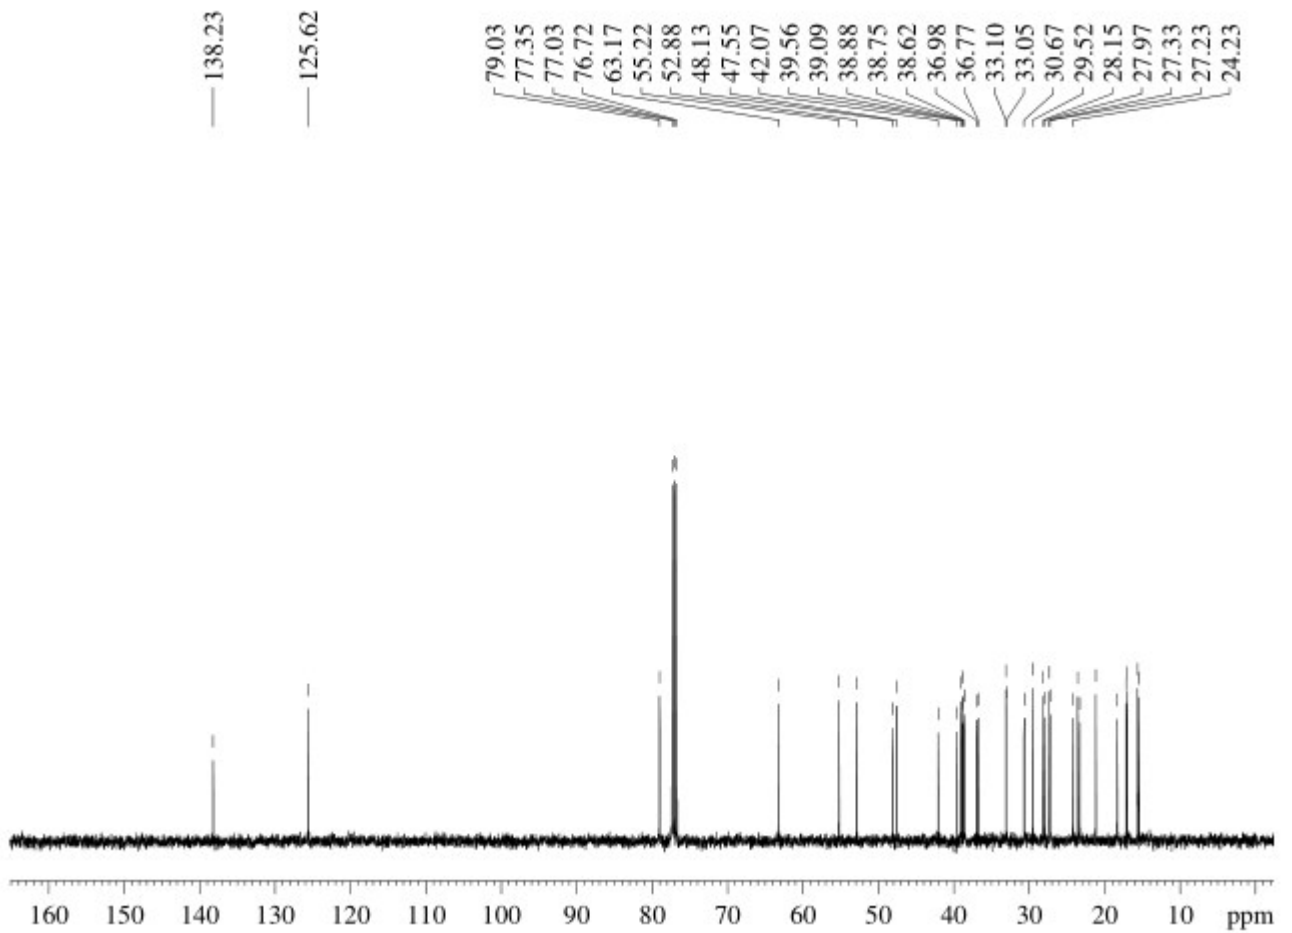

8'-Bromo-3',6'-dioxaoctan-1'-yl-3 $\beta$ -hydroxyurs-12-en-28-oate **12**  
 $^1\text{H}$  NMR spectra ( $\text{CDCl}_3$ )

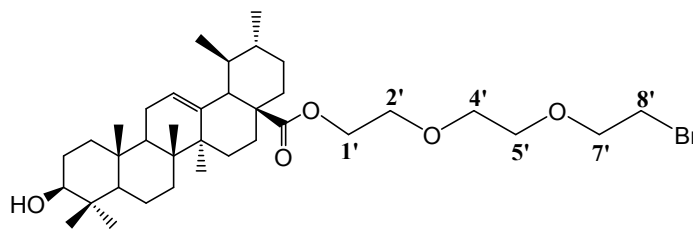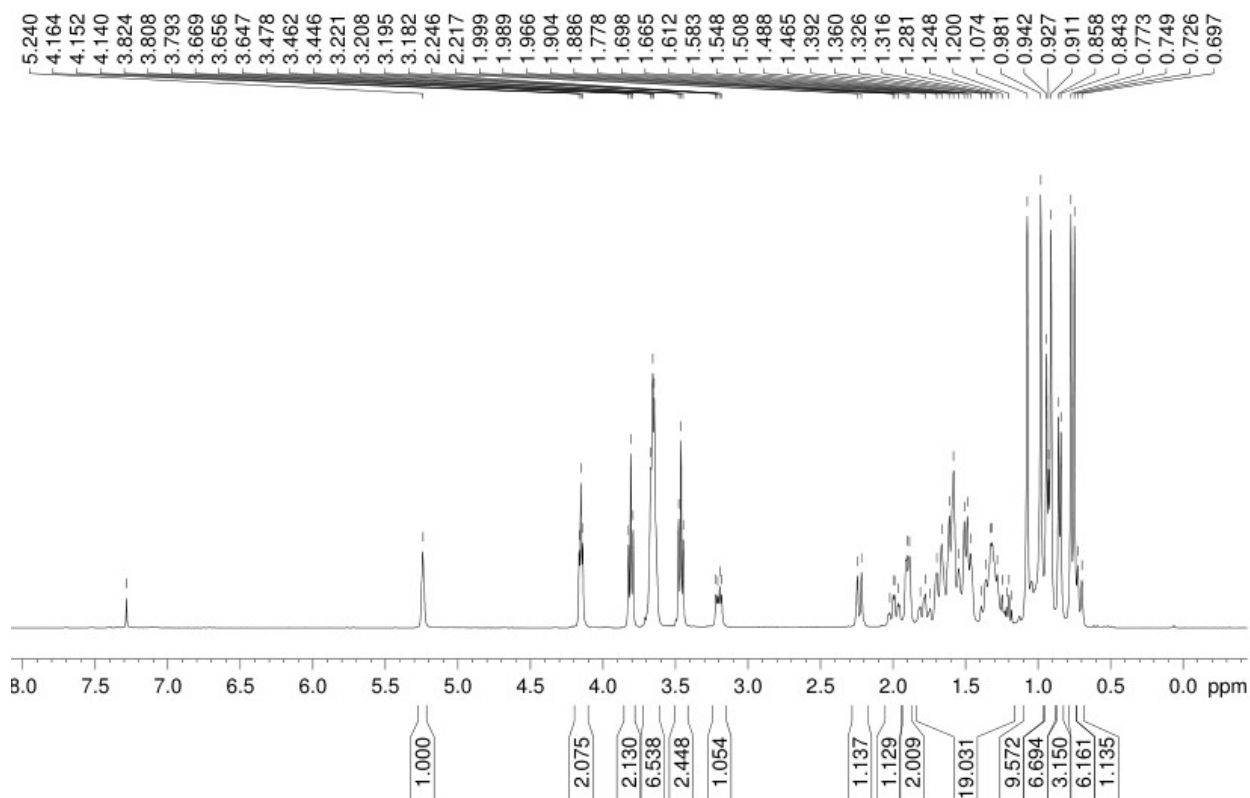

8'-Bromo-3',6'-dioxaoctan-1'-yl-3 $\beta$ -hydroxyurs-12-en-28-oate **12**  
<sup>13</sup>C NMR spectra (CDCl<sub>3</sub>)

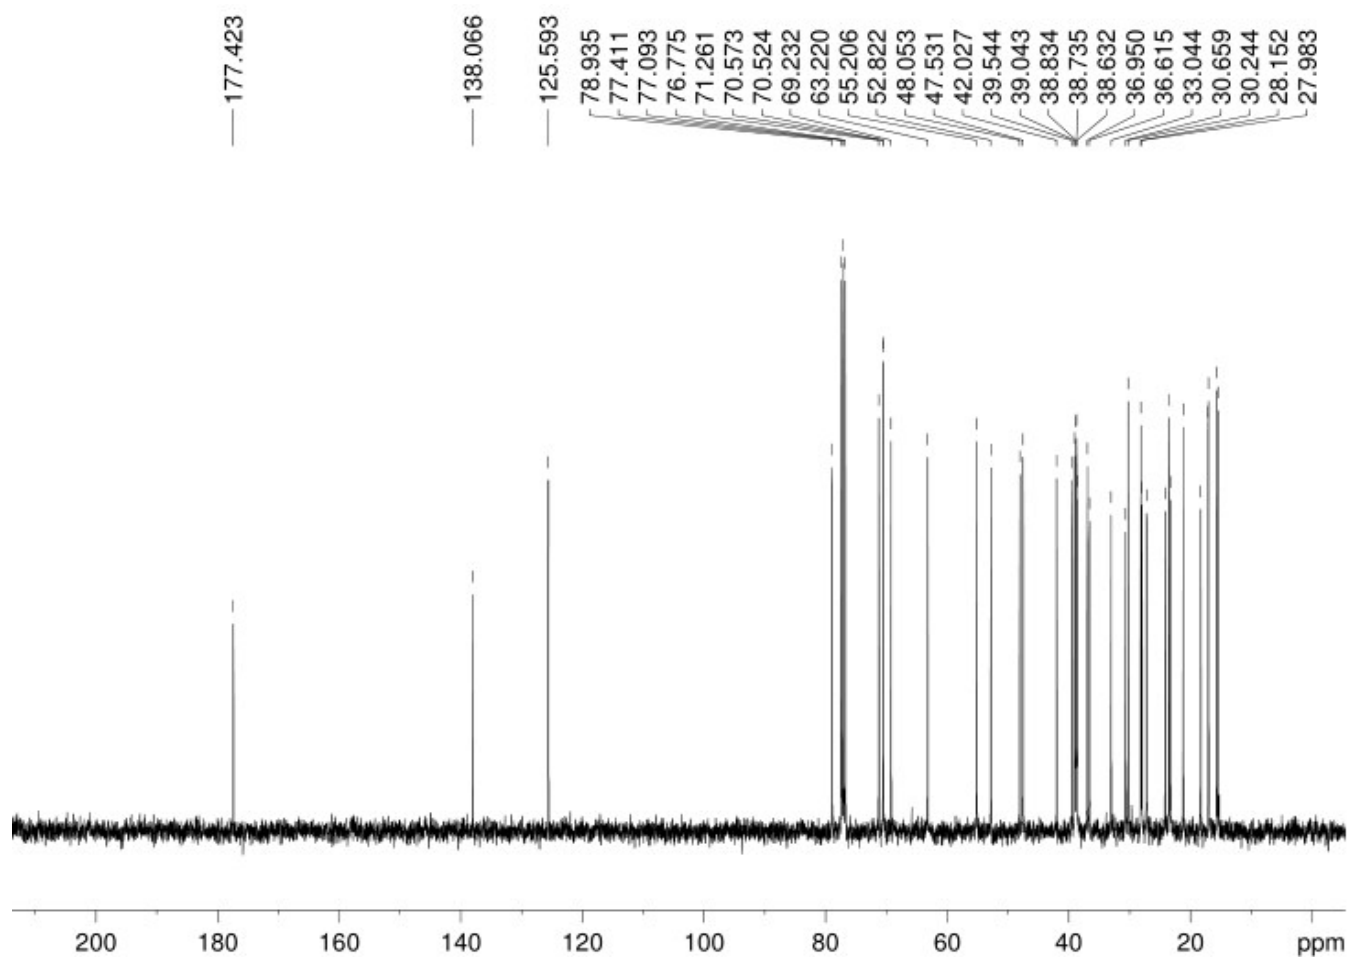

4-(triphenylphosphonio)butyl-3 $\beta$ -hydroxylup-20(29)-en-28-oate bromide **5**  
 $^1\text{H}$  NMR spectra ( $\text{CDCl}_3$ )

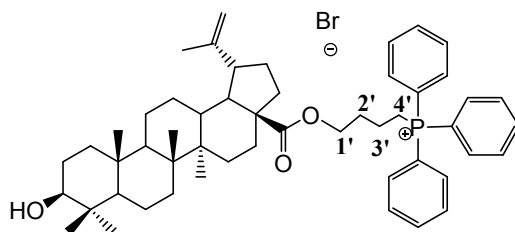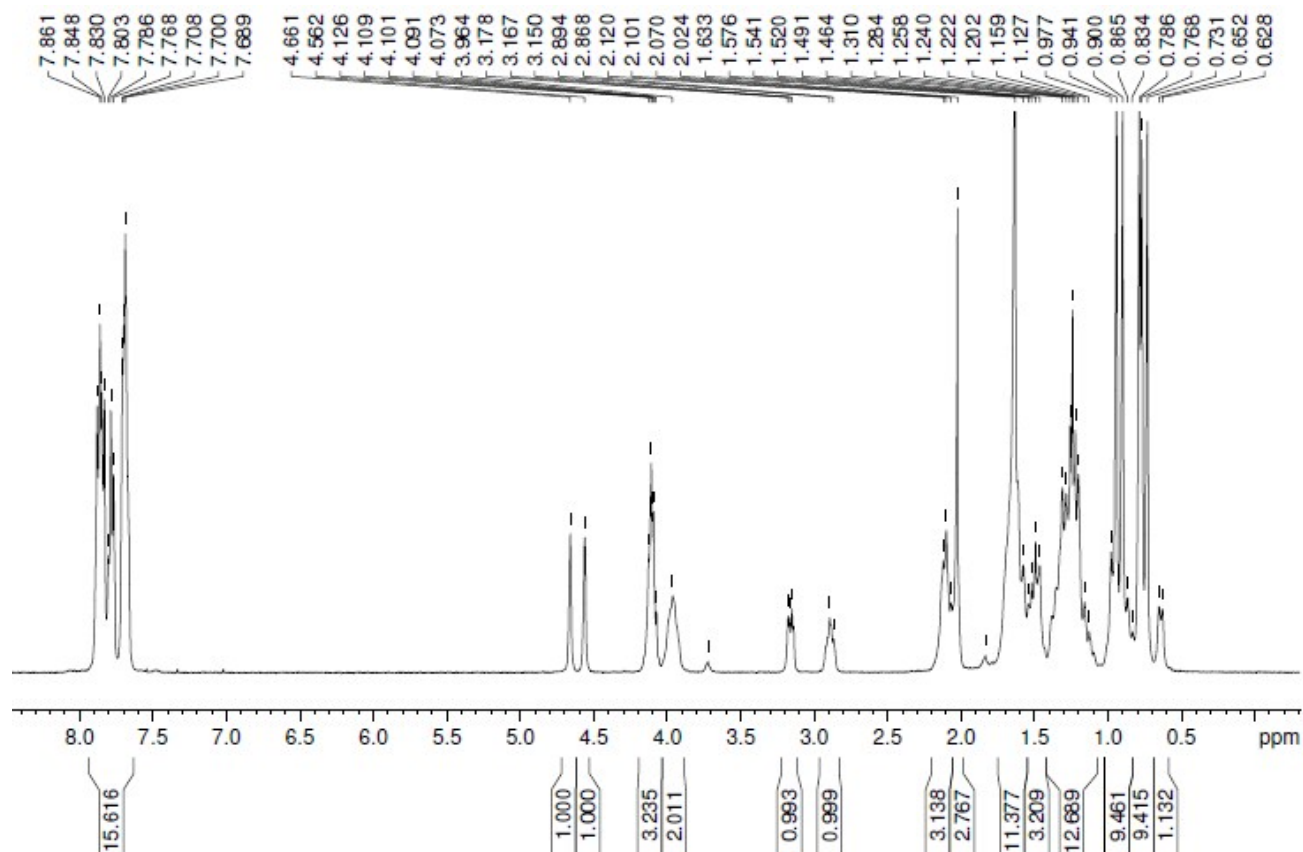

4-(triphenylphosphonio)butyl-3 $\beta$ -hydroxylup-20(29)-en-28-oate bromide **5**  
 $^{13}\text{C}$  NMR spectra ( $\text{CDCl}_3$ )

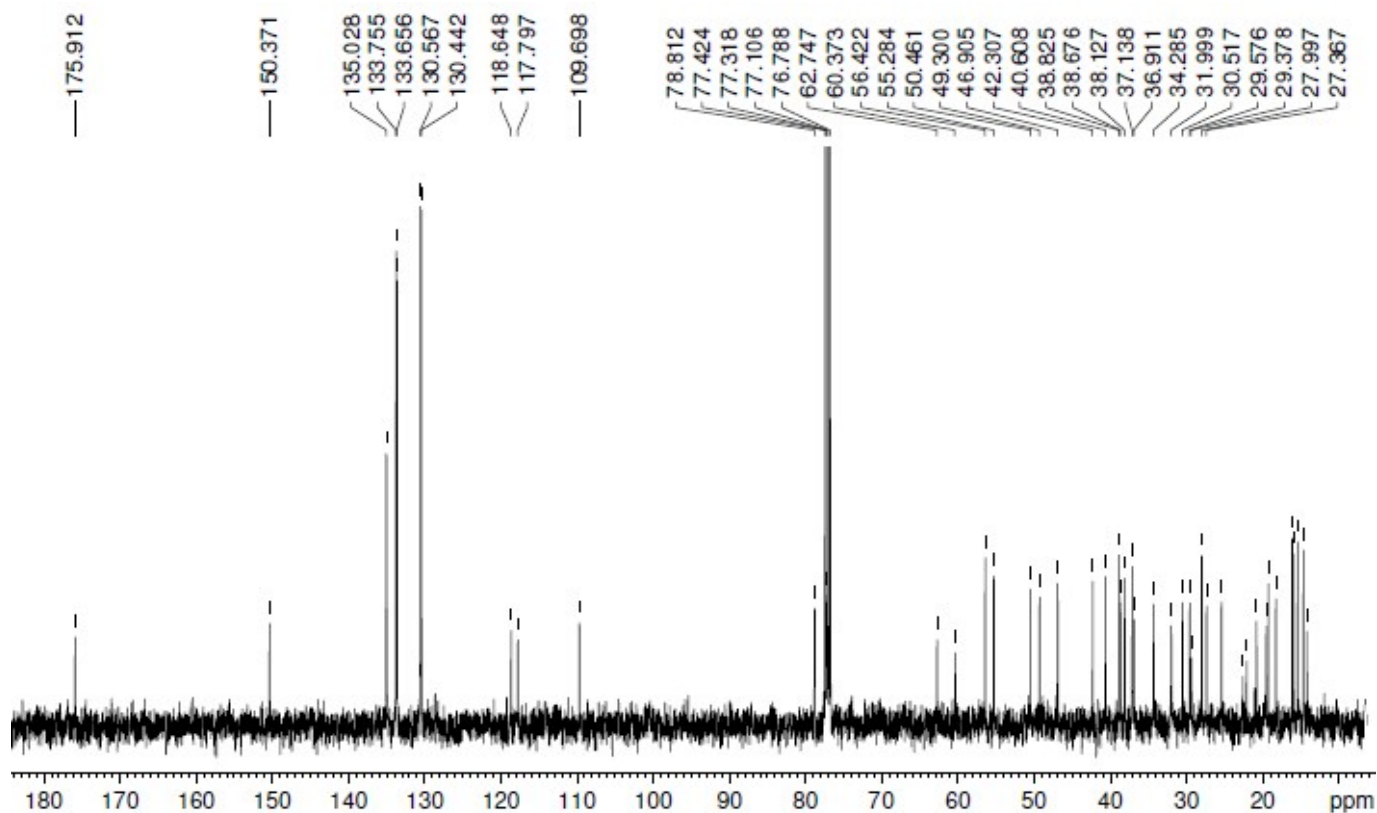

4-(triphenylphosphonio)butyl-3 $\beta$ -hydroxylup-20(29)-en-28-oate bromide **5**  
 $^{31}\text{P}$  NMR spectra ( $\text{CDCl}_3$ )

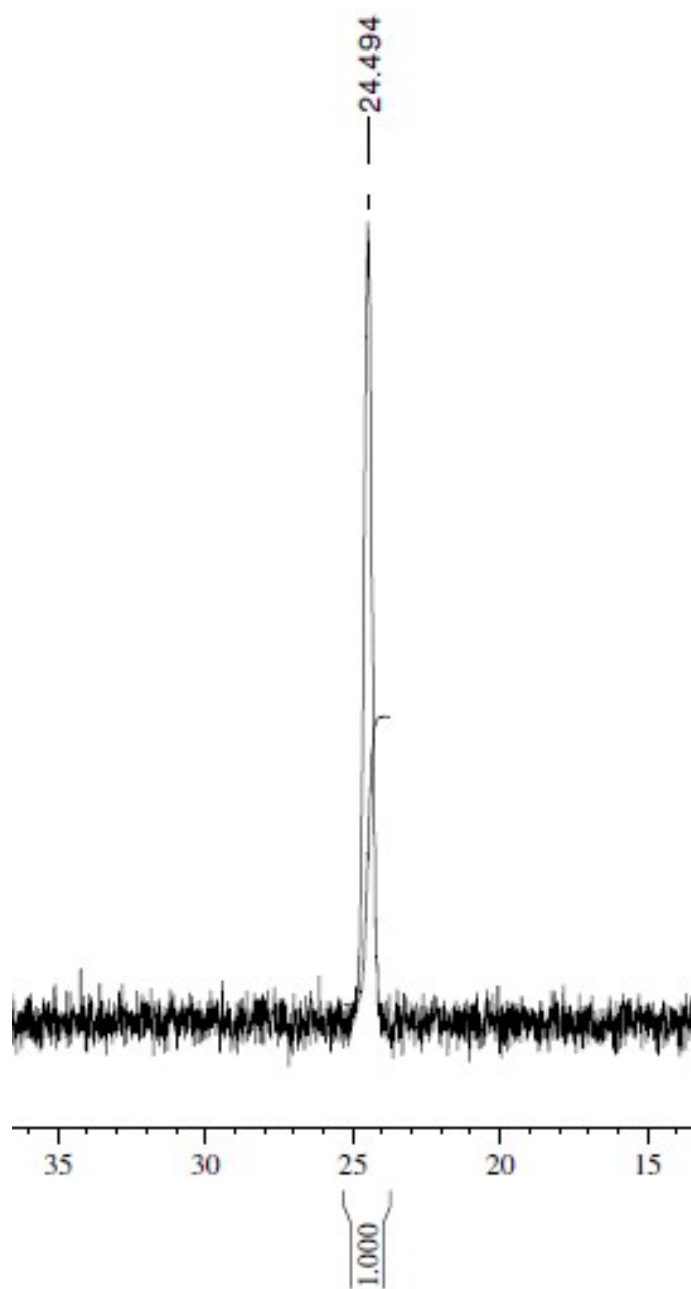

8'-(triphenylphosphonio-3',6'-dioxaoctan-1'-yl)-3 $\beta$ -acetoxyilup-20(29)-en-28-oate bromide **7**  
 $^1\text{H}$  NMR spectra ( $\text{CDCl}_3$ )

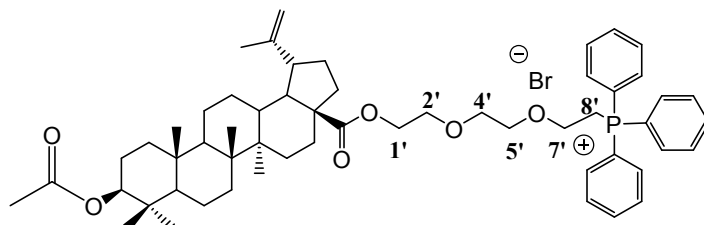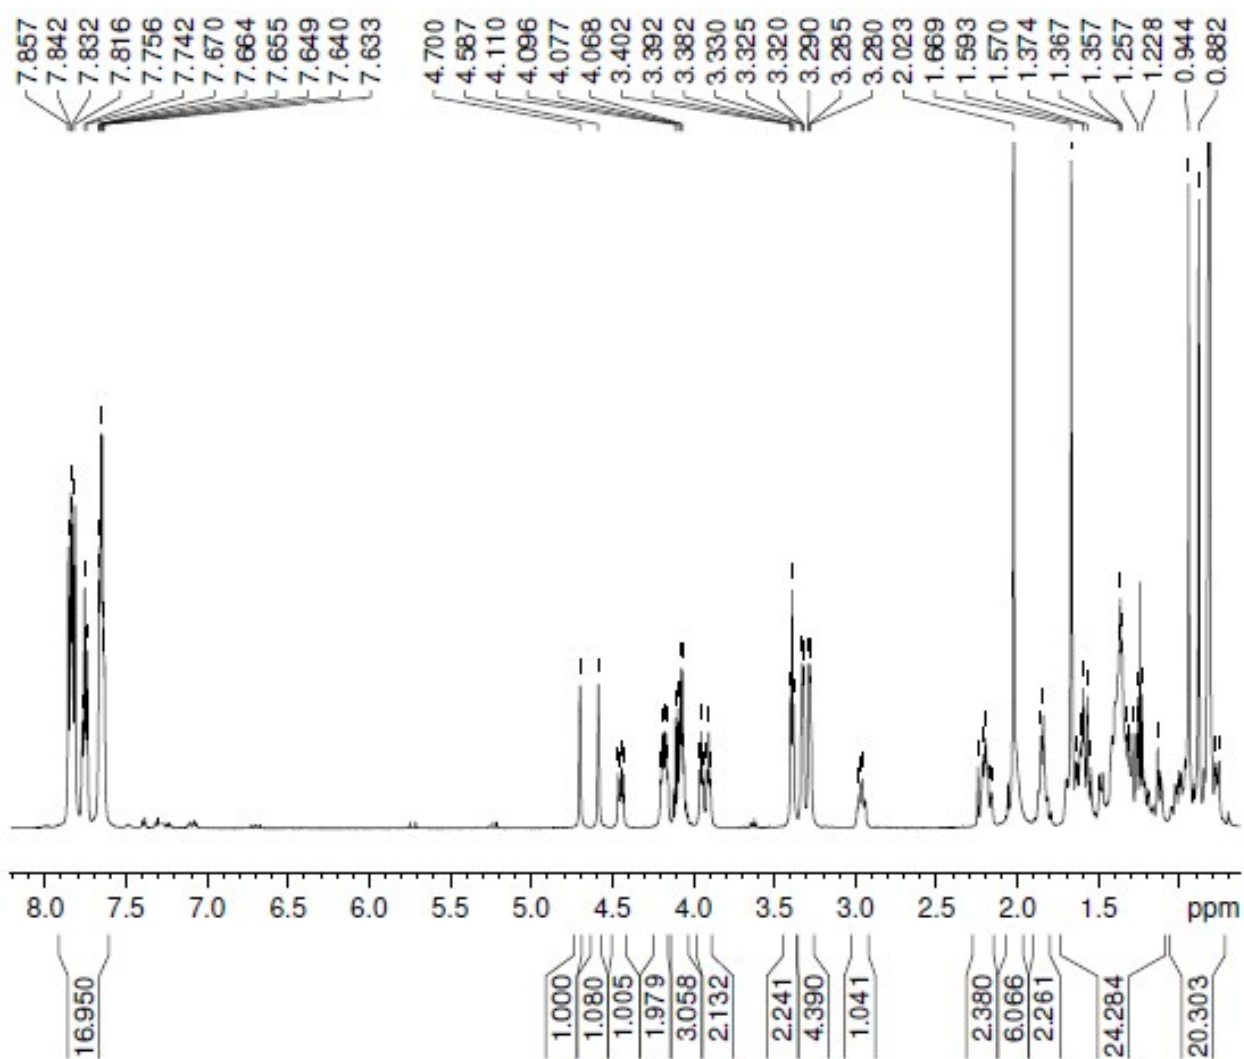



8'-(triphenylphosphonio-3',6'-dioxaoctan-1'-yl)-3 $\beta$ -acetylup-20(29)-en-28-oate bromide **7**  
 $^{13}\text{C}$  NMR spectra ( $\text{CDCl}_3$ )

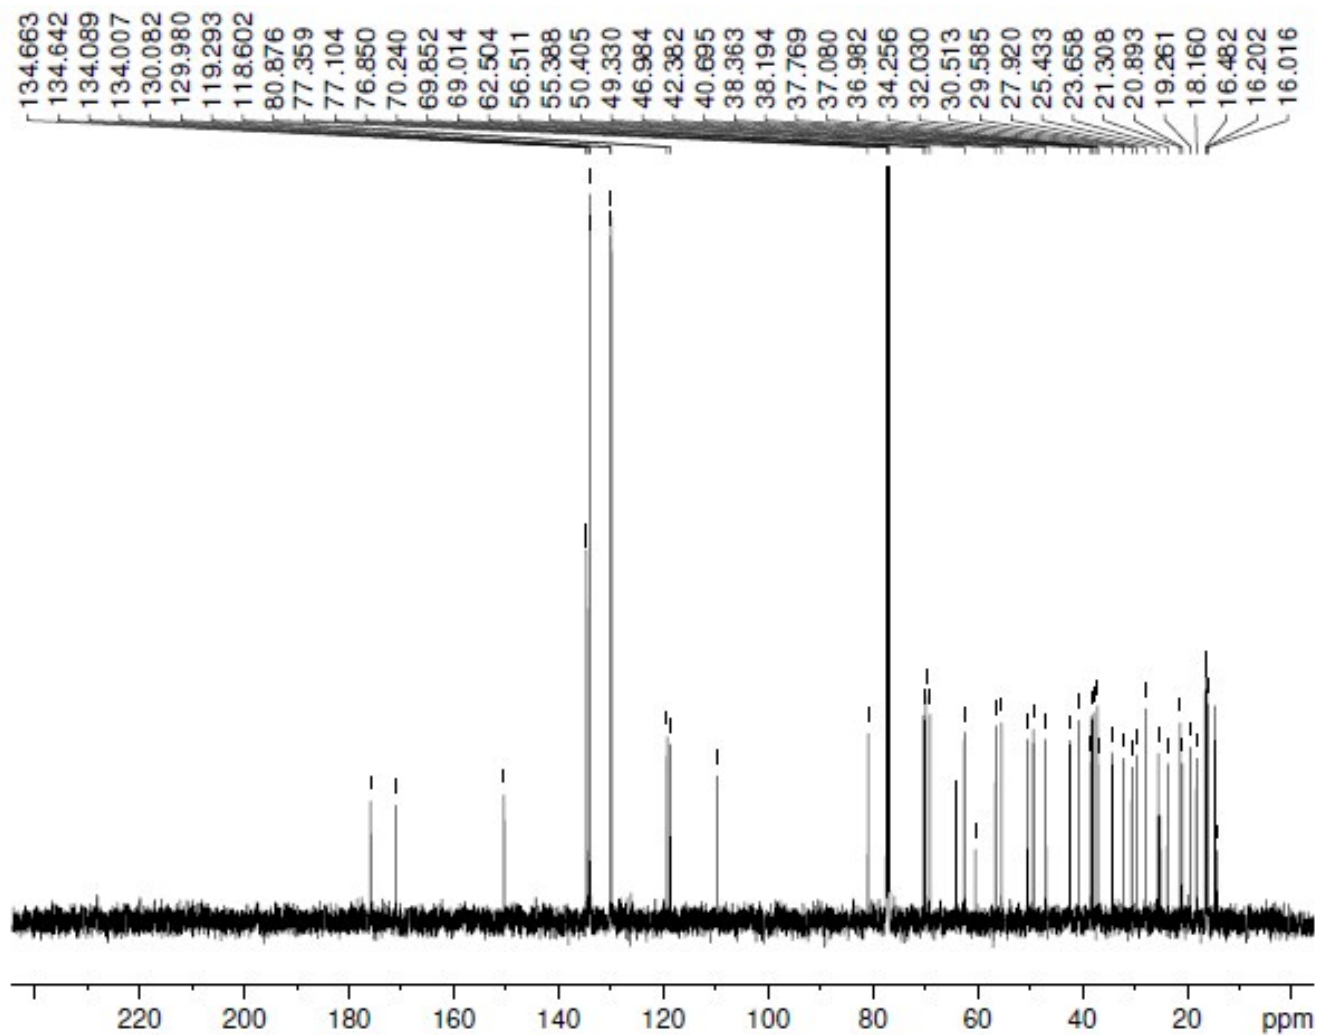

8'-(triphenylphosphonio-3',6'-dioxaoctan-1'-yl)-3 $\beta$ -acetoxylup-20(29)-en-28-oate bromide **7**  
<sup>31</sup>P NMR spectra (CDCl<sub>3</sub>)

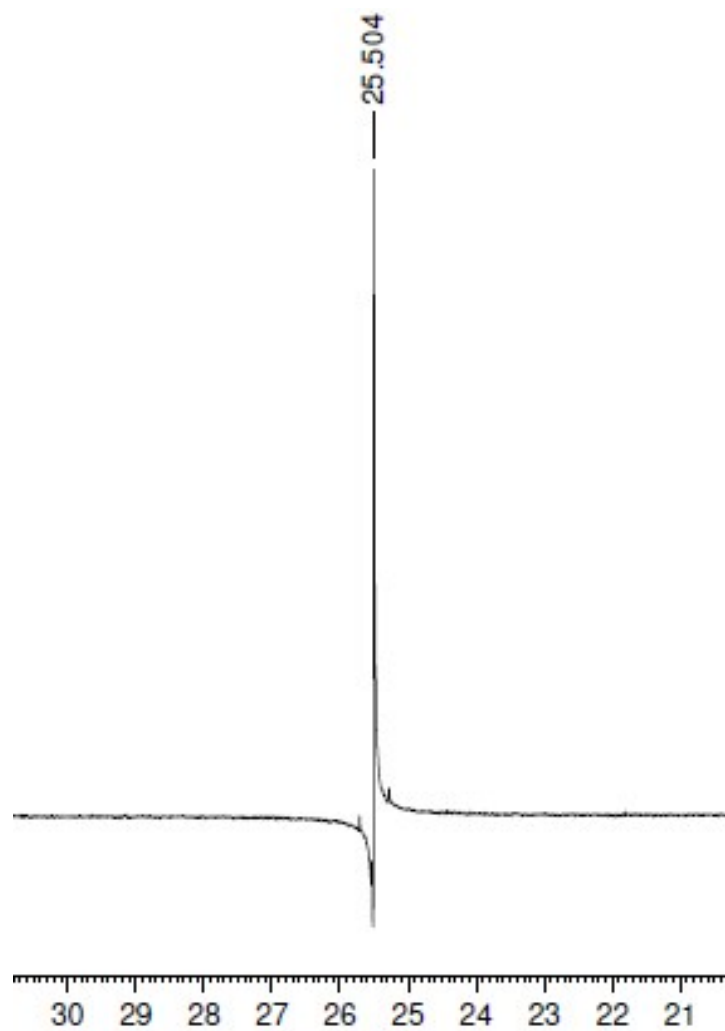

9'-(triphenylphosphonio-3',6'-dioxaoctan-1'-yl)-3 $\beta$ -acetoxylup-20(29)-en-28-oate tosyl 8  
<sup>1</sup>H NMR spectra (CDCl<sub>3</sub>)

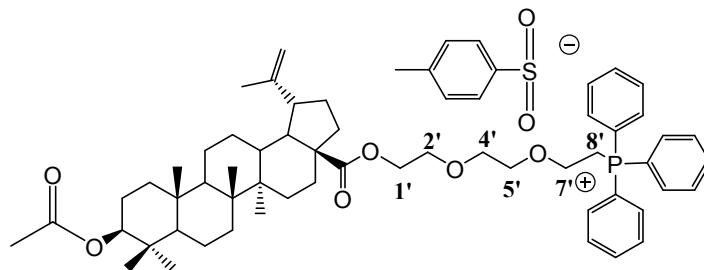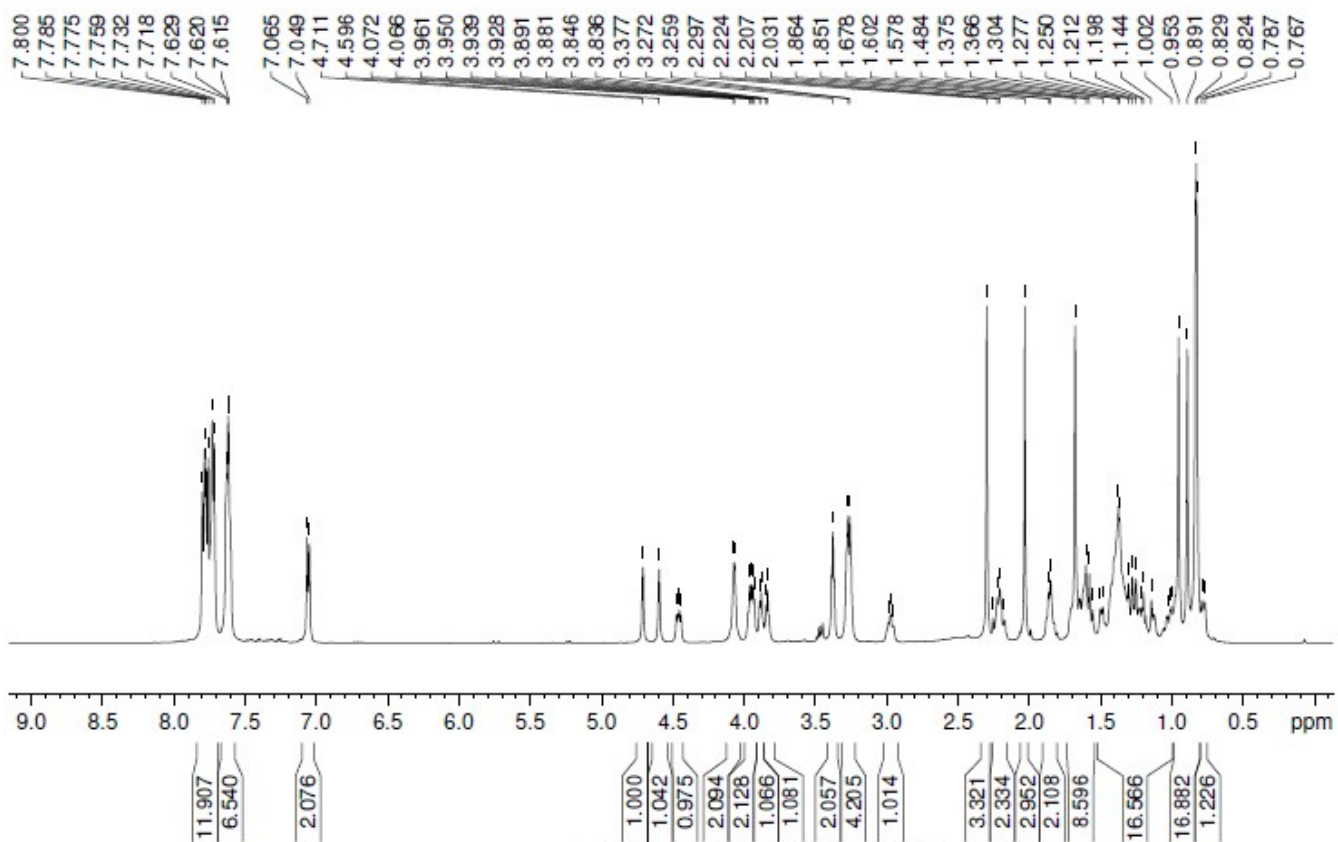

9'-(triphenylphosphonio-3',6'-dioxaoctan-1'-yl)-3 $\beta$ -acetylup-20(29)-en-28-oate tosyl **8**  
<sup>13</sup>C NMR spectra (CDCl<sub>3</sub>)

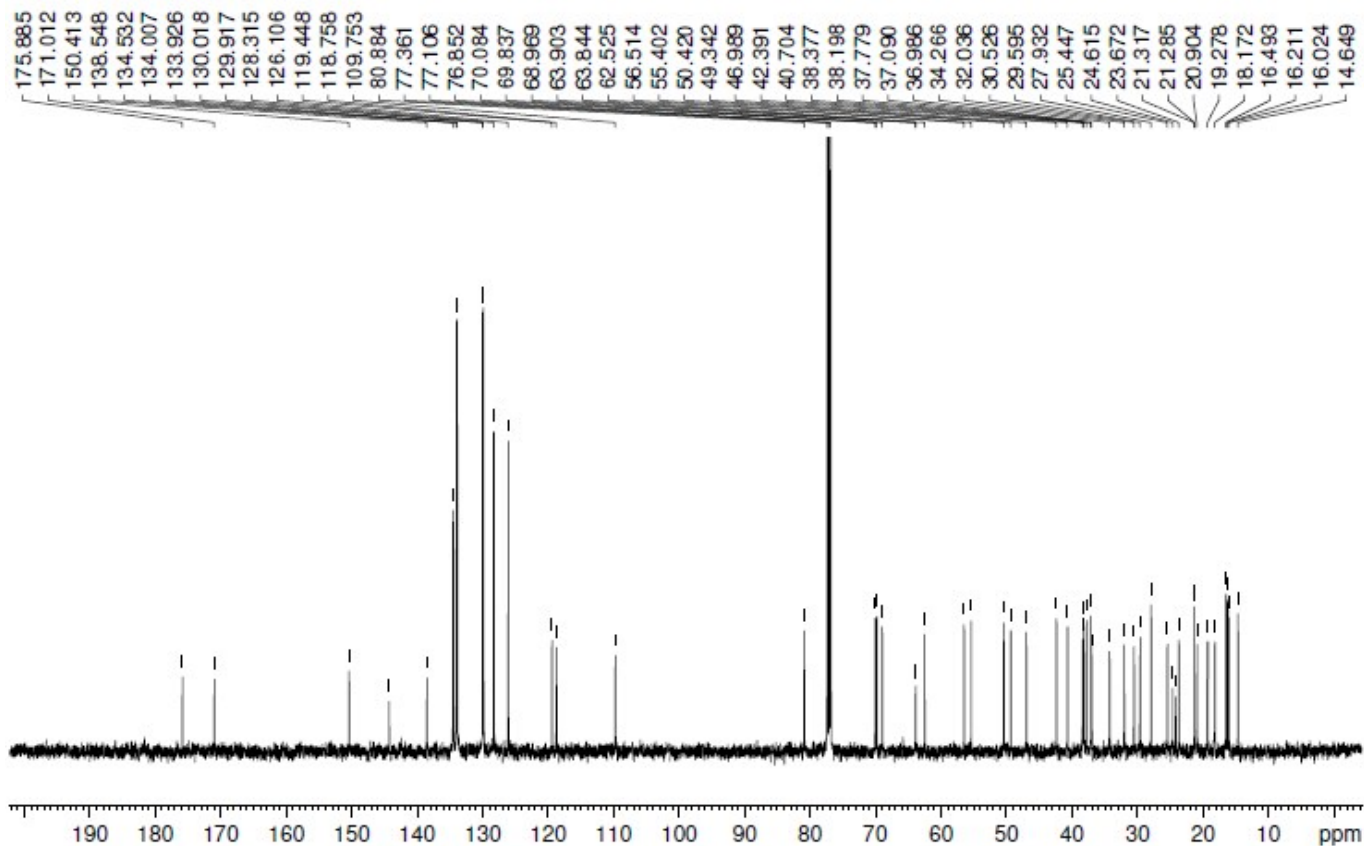

9'-(triphenylphosphonio-3',6'-dioxaoctan-1'-yl)-3 $\beta$ -acetylup-20(29)-en-28-oate tosyl **8**  
 $^{31}\text{P}$  NMR spectra ( $\text{CDCl}_3$ )

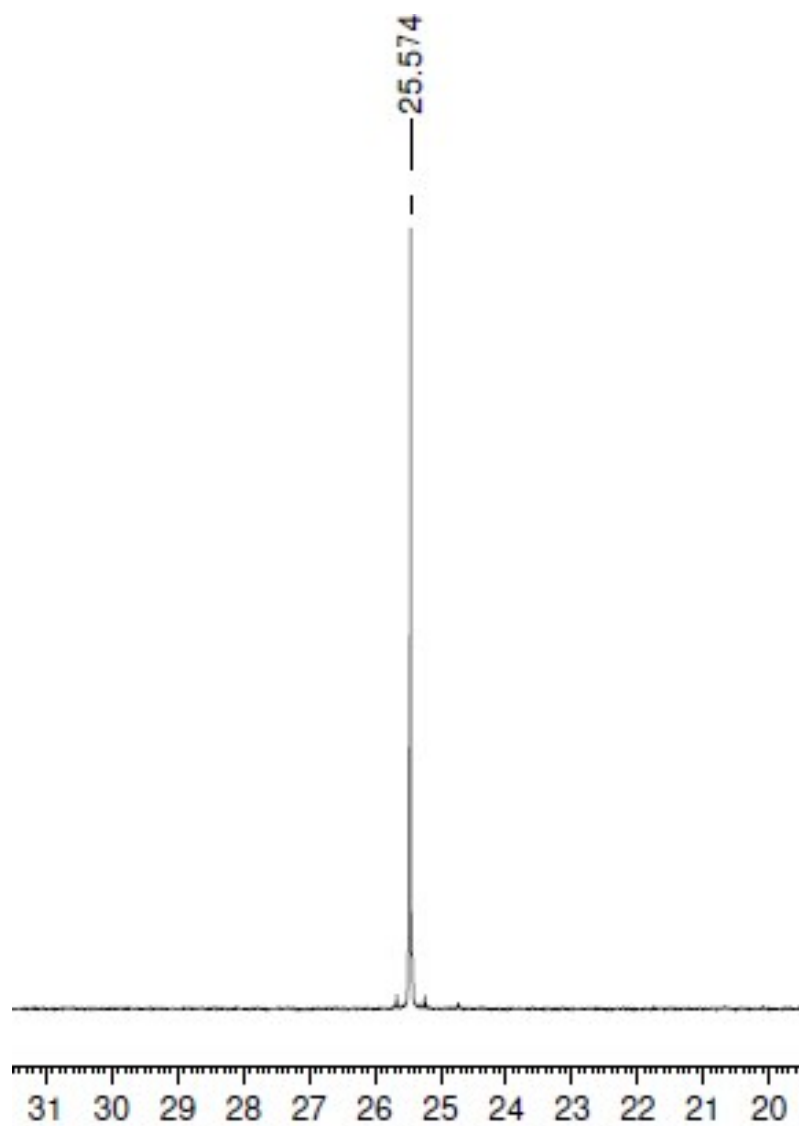

9'-(triphenylphosphonio-3',6'-dioxaoctan-1'-yl)-3 $\beta$ -hydroxylup-20(29)-en-28-oate bromide **9**  
 $^1\text{H}$  NMR spectra ( $\text{CDCl}_3$ )

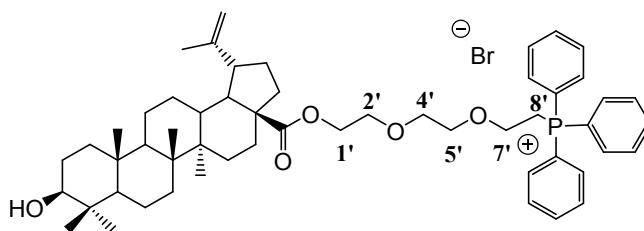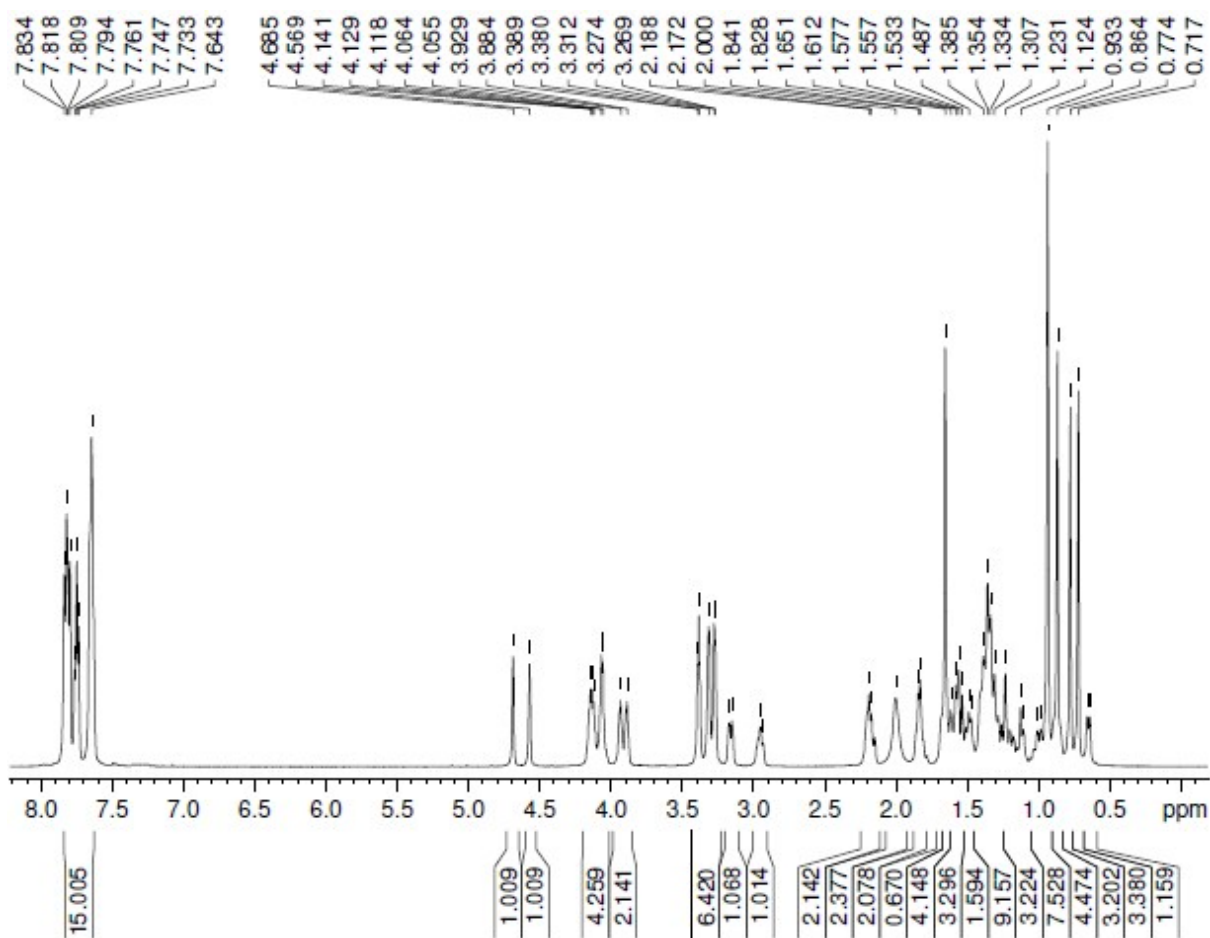

9'-(triphenylphosphonio-3',6'-dioxaoctan-1'-yl)-3 $\beta$ -hydroxylup-20(29)-en-28-oate bromide **9**  
 $^{13}\text{C}$  NMR spectra ( $\text{CDCl}_3$ )

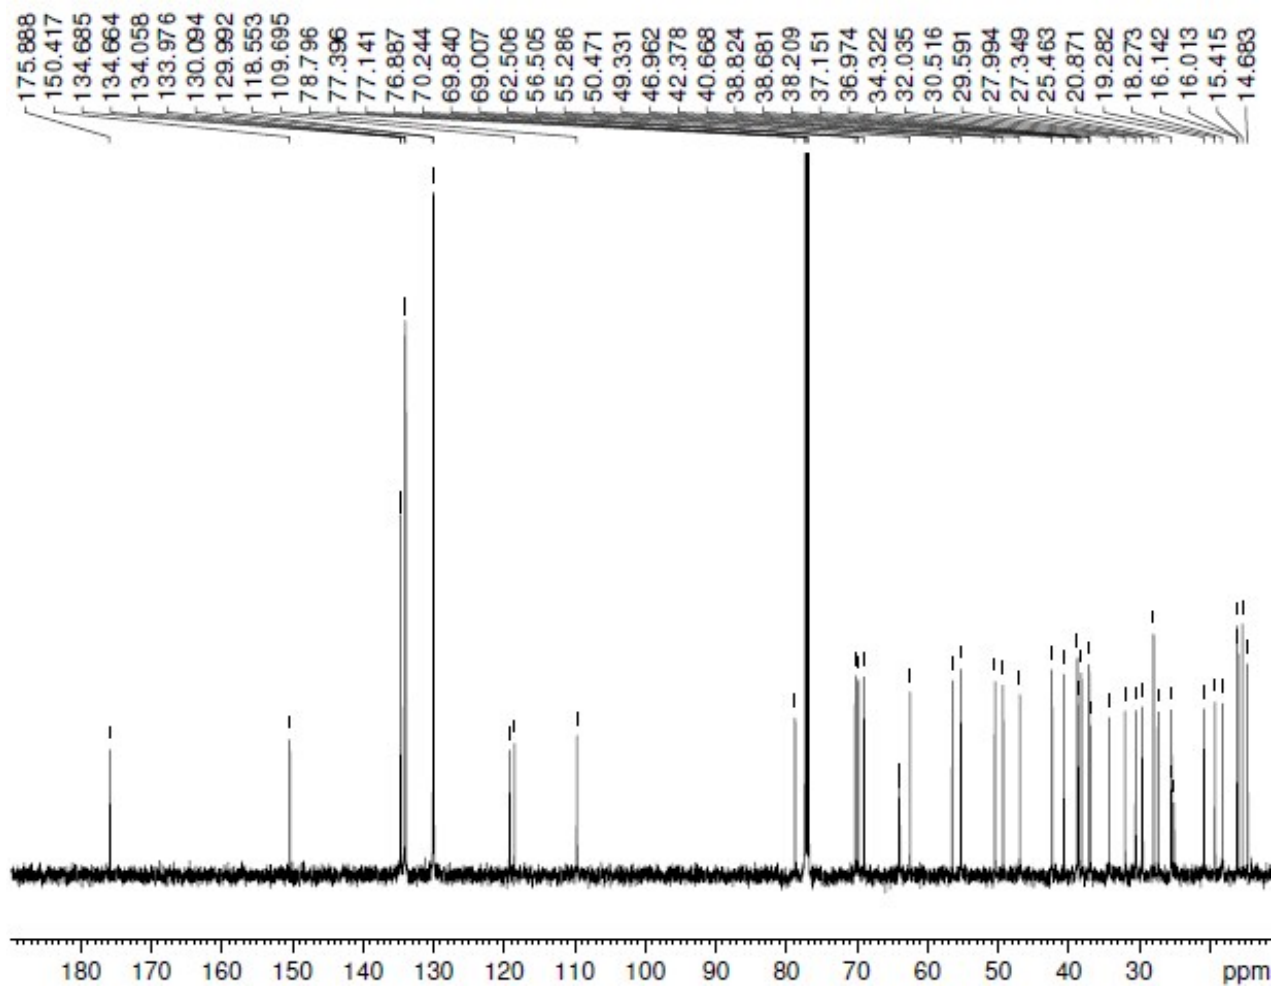

9'-(triphenylphosphonio-3',6'-dioxaoctan-1'-yl)-3 $\beta$ -hydroxylup-20(29)-en-28-oate bromide **9**  
 $^{31}\text{P}$  NMR spectra ( $\text{CDCl}_3$ )

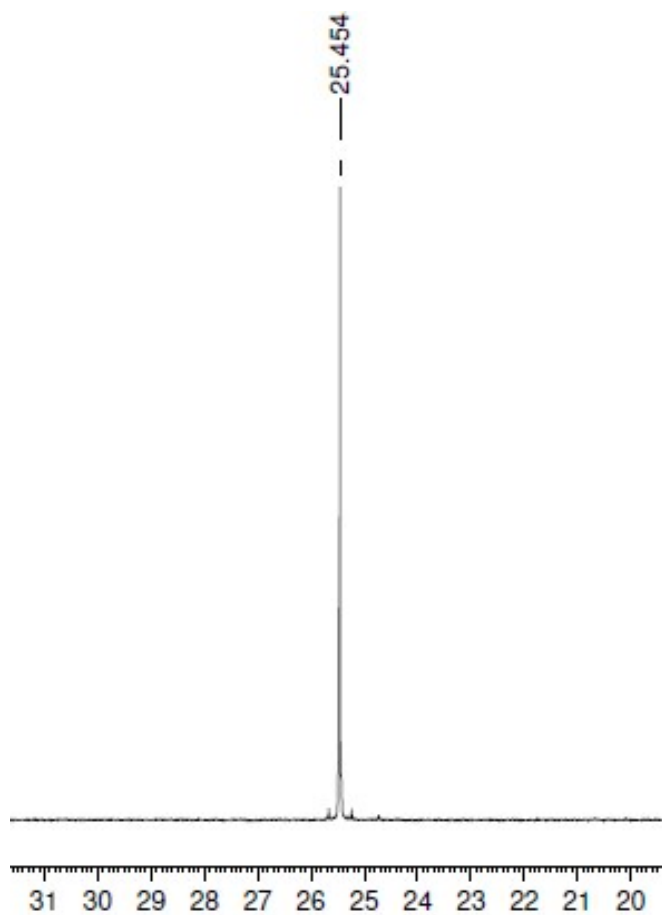



4-(triphenylphosphonio)butyl-3 $\beta$ -hydroxyurs-12en-28-oate bromide **13**  
 $^1\text{H}$  NMR spectra ( $\text{CDCl}_3$ )

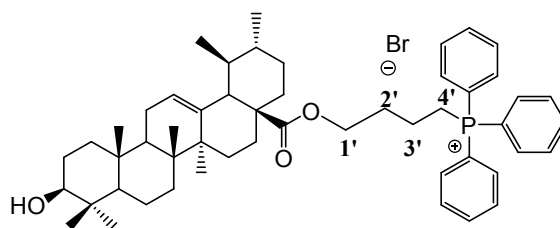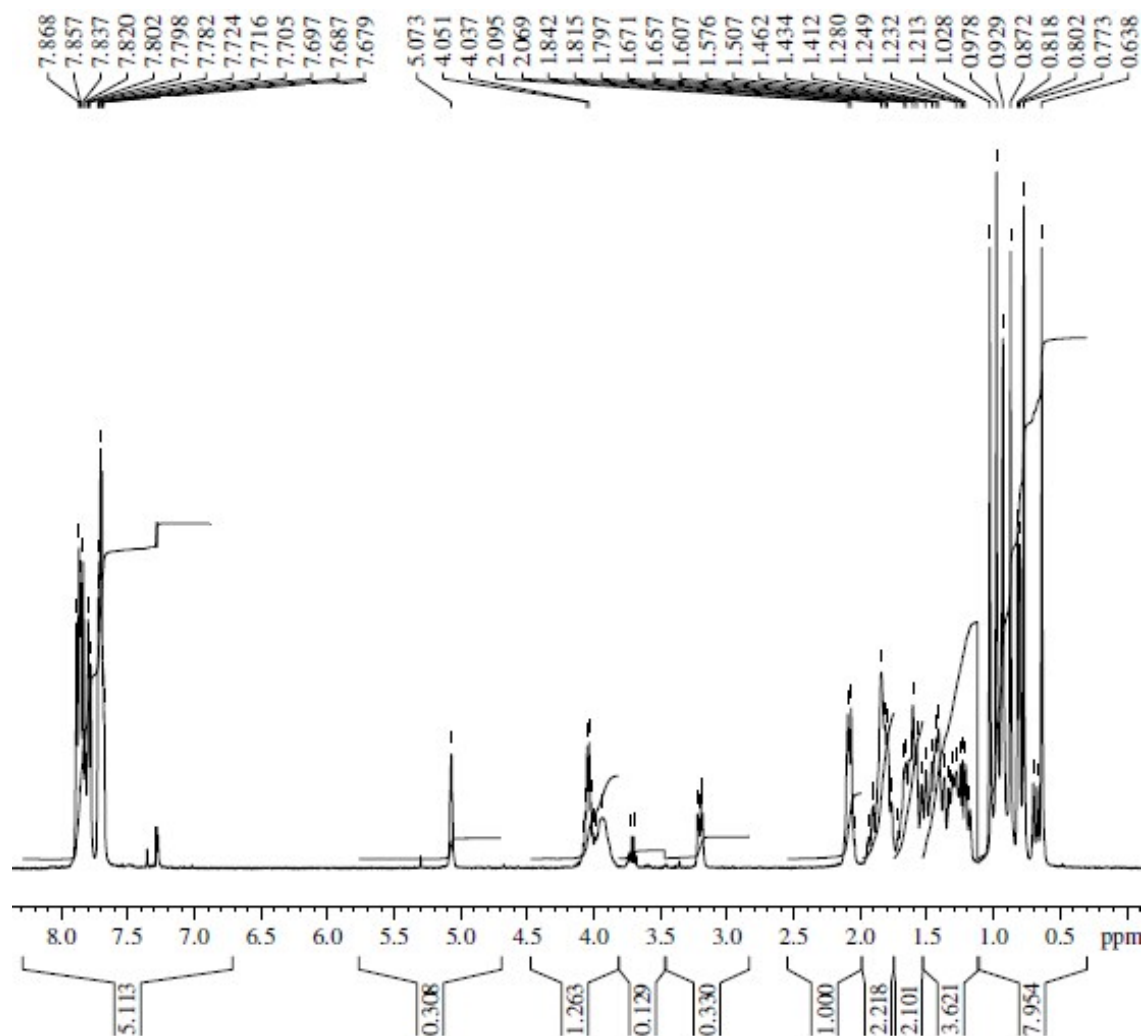

4-(triphenylphosphonio)butyl-3 $\beta$ -hydroxyurs-12en-28-oate bromide **13**  
 $^{13}\text{C}$  NMR spectra ( $\text{CDCl}_3$ )

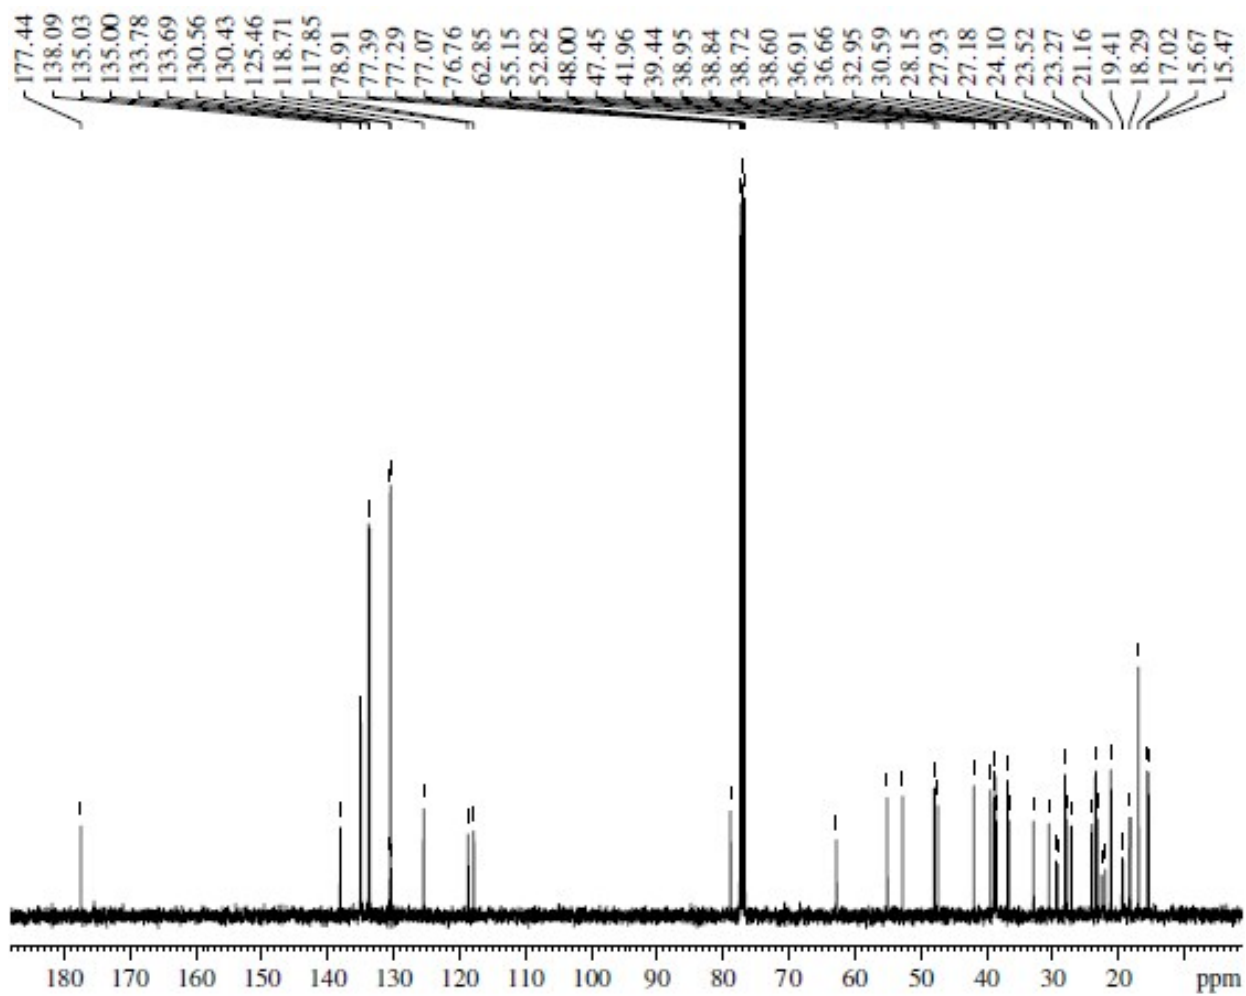

4-(triphenylphosphonio)butyl-3 $\beta$ -hydroxyurs-12en-28-oate bromide **13**  
 $^{31}\text{P}$  NMR spectra ( $\text{CDCl}_3$ )

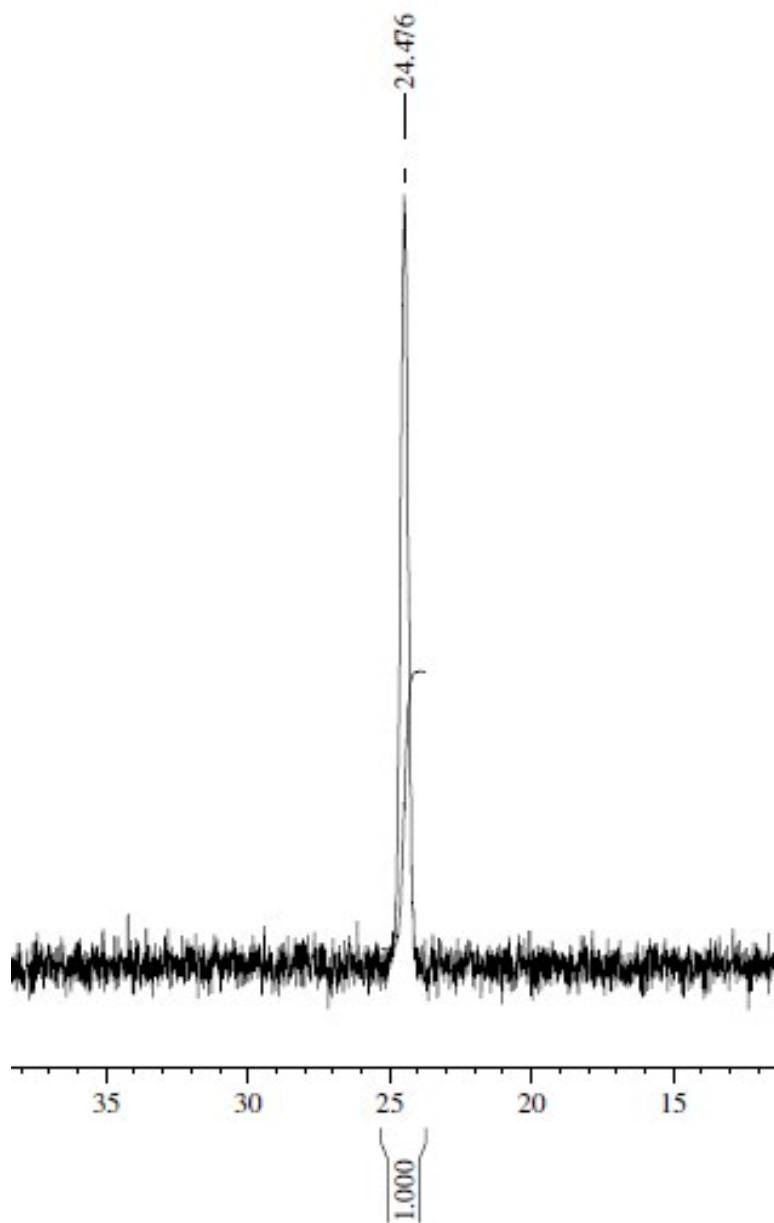

8'-(triphenylphosphonio-3',6'-dioxaoctan-1'-yl)-3 $\beta$ -hydroxyurs-12-en-28-oate bromide **15**  
 $^1\text{H}$  NMR spectra ( $\text{CDCl}_3$ )

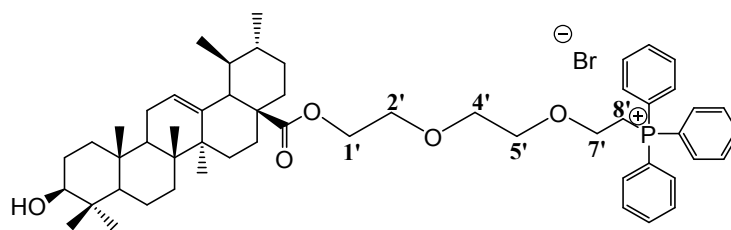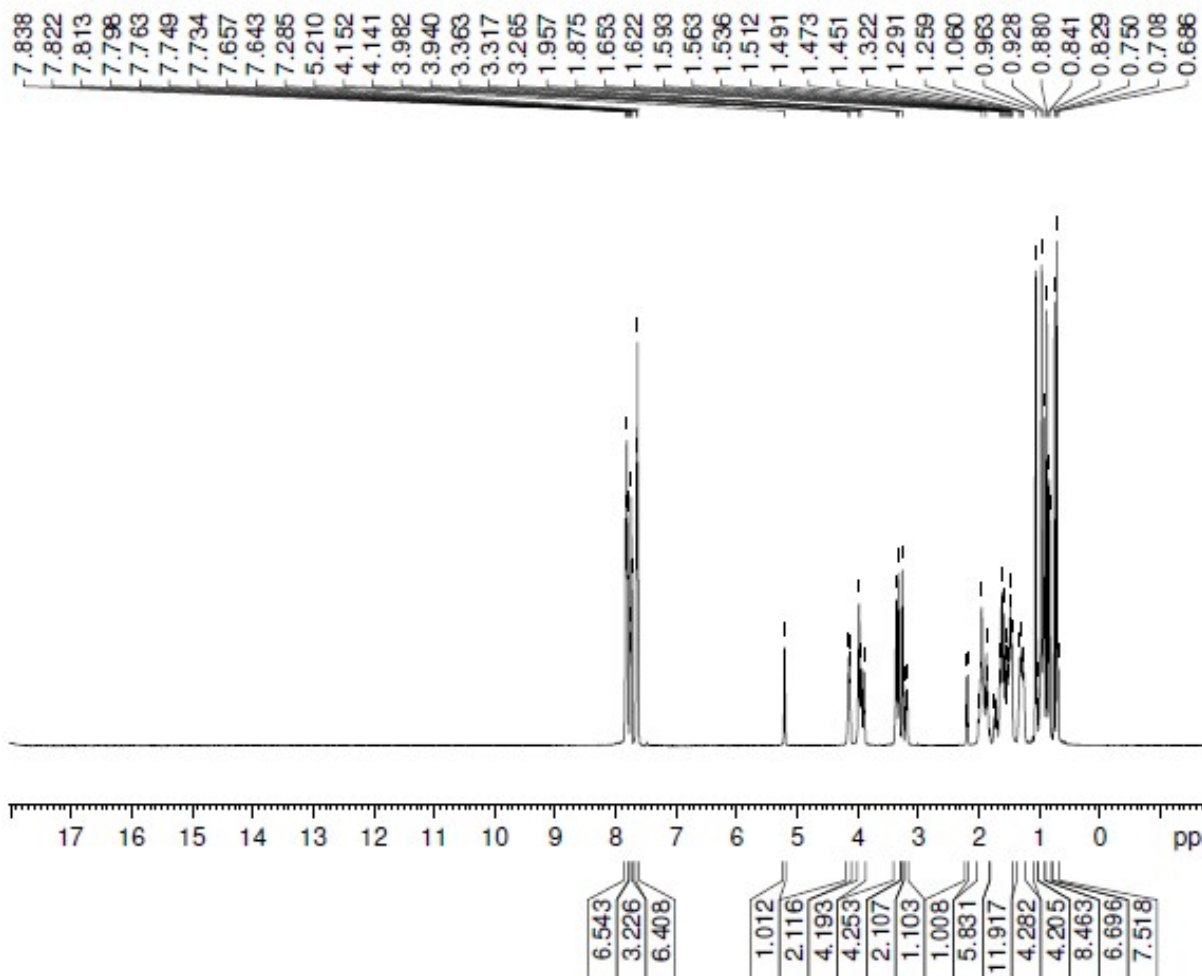

8'-(triphenylphosphonio-3',6'-dioxaoctan-1'-yl)-3 $\beta$ -hydroxyurs-12en-28-oate bromide **15**  
 $^{13}\text{C}$  NMR spectra ( $\text{CDCl}_3$ )

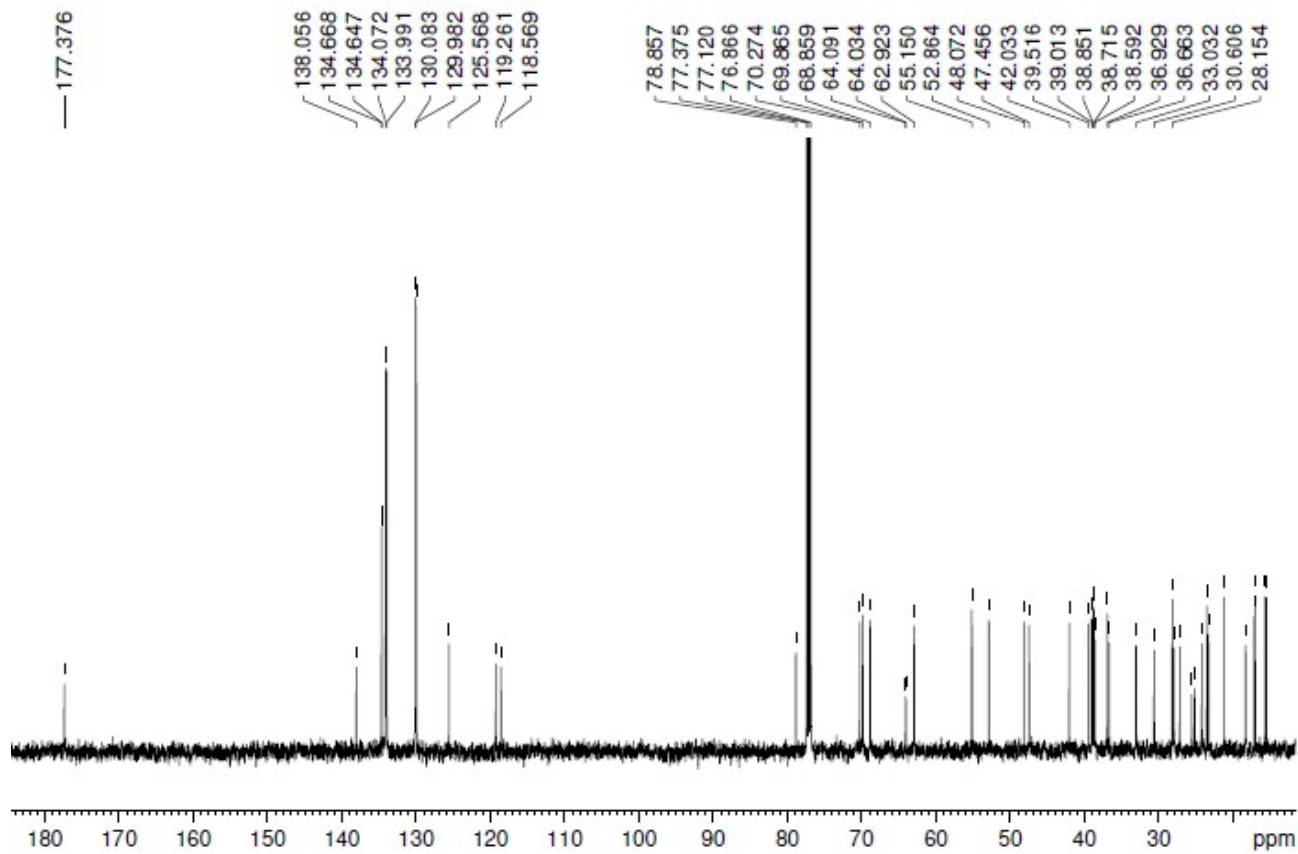

8'-(triphenylphosphonio-3',6'-dioxaoctan-1'-yl)-3 $\beta$ -hydroxyurs-12en-28-oate bromide **15**  
<sup>31</sup>P NMR spectra (CDCl<sub>3</sub>)

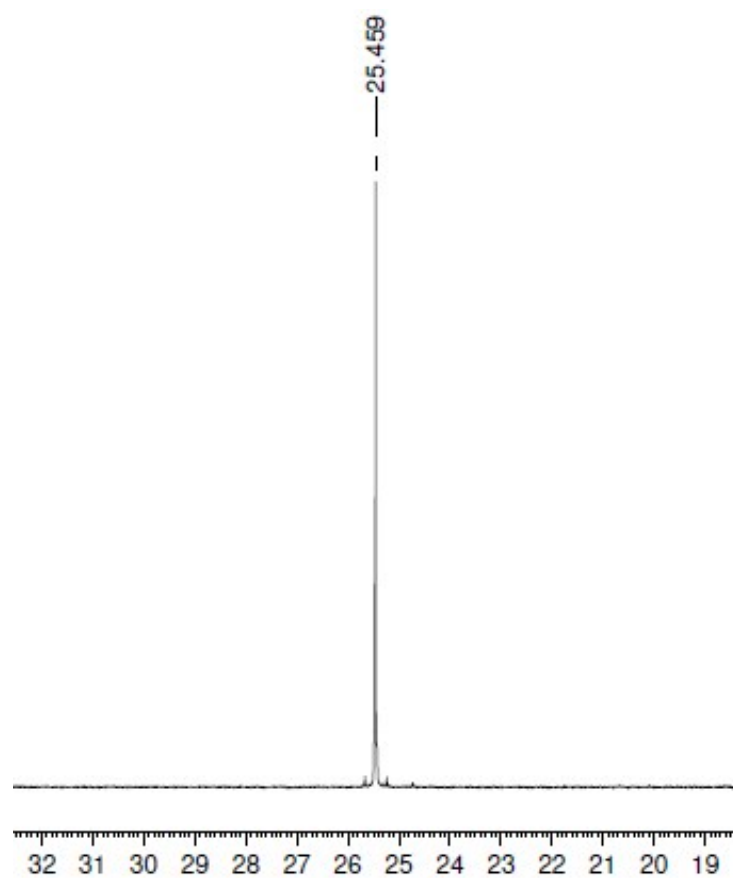

4'-(triphenylphosphonio)butyl-3 $\beta$ -dichloroacetoxylyup-20(29)-en-28-oate bromide **6**  
 $^1\text{H}$  NMR spectra ( $\text{CDCl}_3$ )

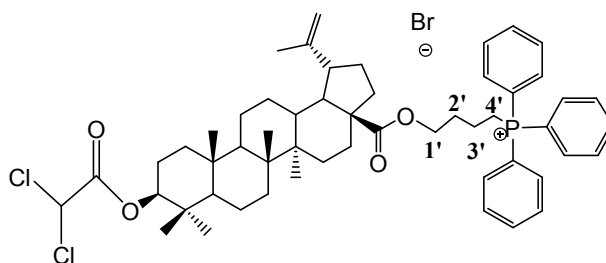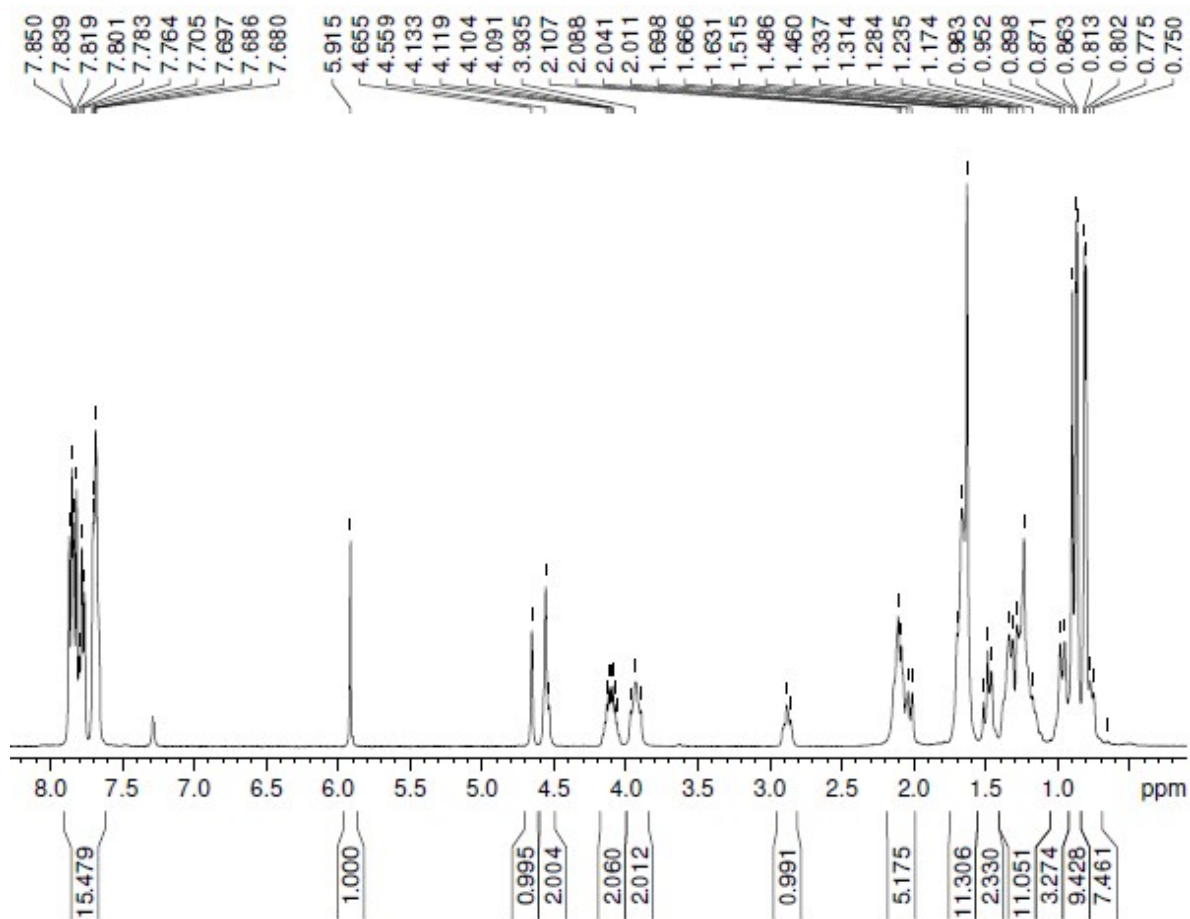

4'-(triphenylphosphonio)butyl-3 $\beta$ -dichloroacetylup-20(29)-en-28-oate bromide **6**  
 $^{13}\text{C}$  NMR spectra ( $\text{CDCl}_3$ )

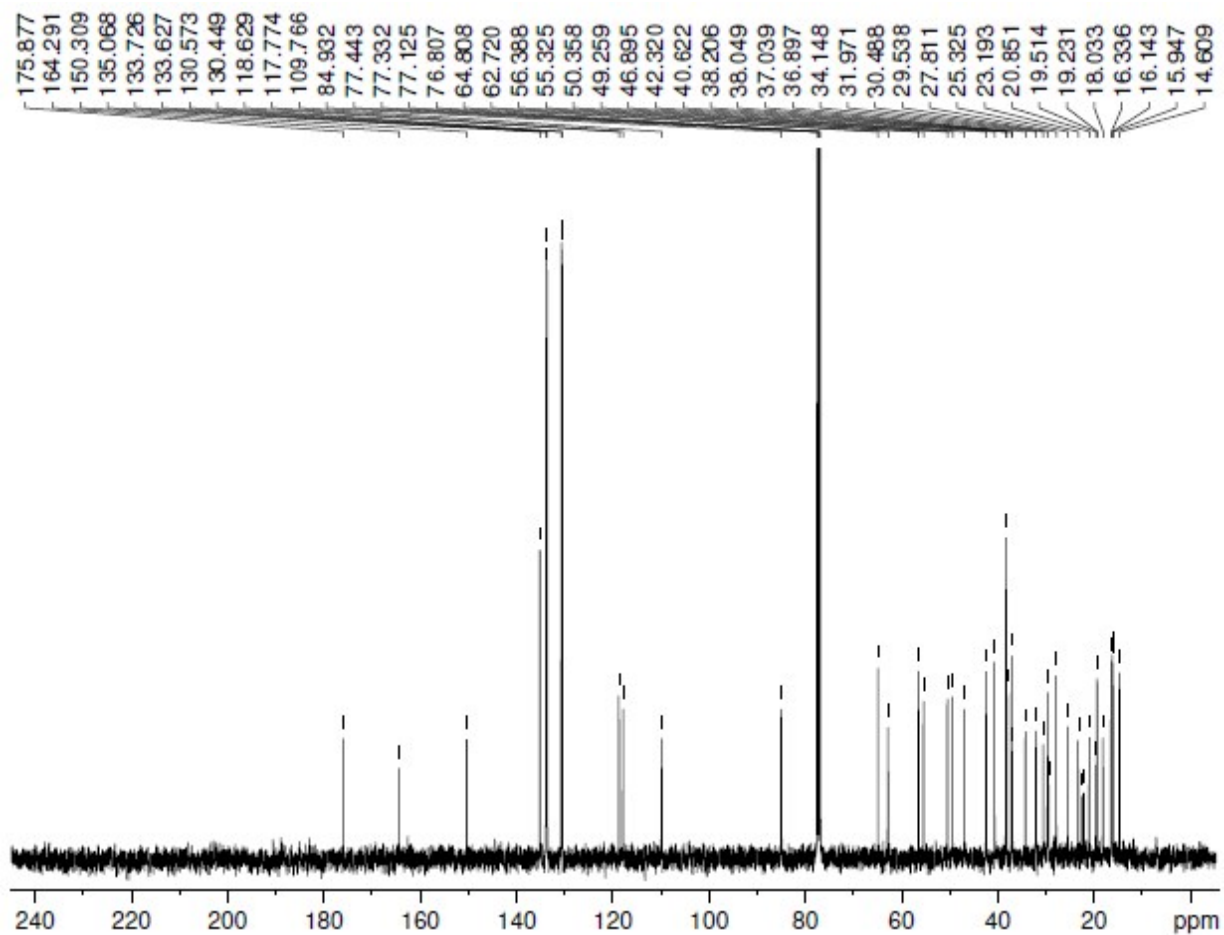



4'-(triphenylphosphonio)butyl-3 $\beta$ -dichloroacetylup-20(29)-en-28-oate bromide **6**  
 $^{31}\text{P}$  NMR spectra ( $\text{CDCl}_3$ )

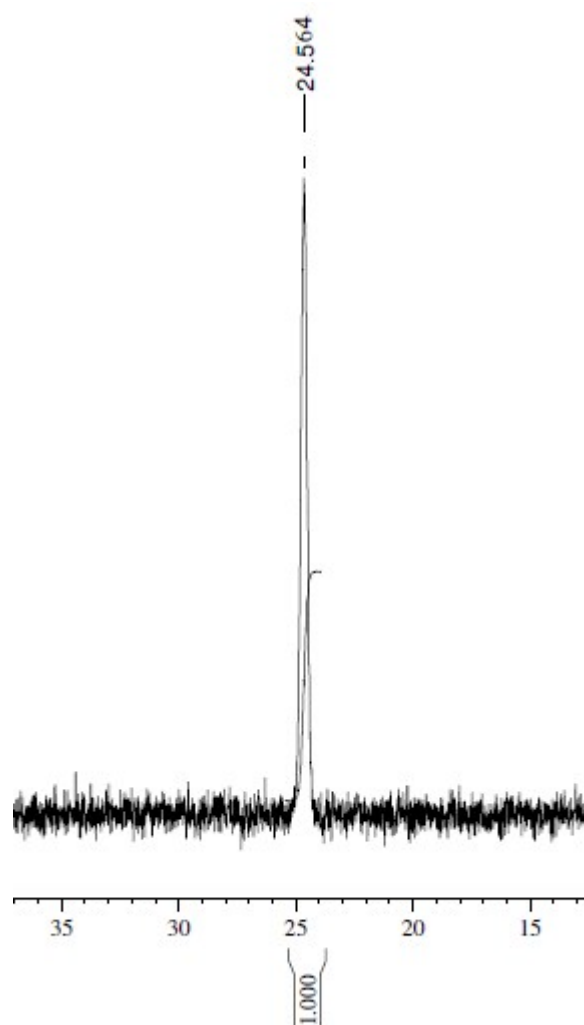

8'-(triphenylphosphonio-3',6'-dioxaoctan-1'-yl)-3 $\beta$ -dichloroacetoxylop-20(29)-en-28-oate bromide **10**  
<sup>1</sup>H NMR spectra (CDCl<sub>3</sub>)

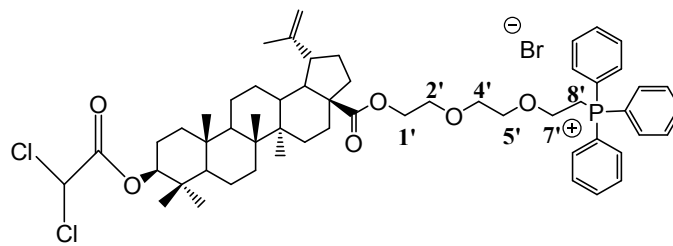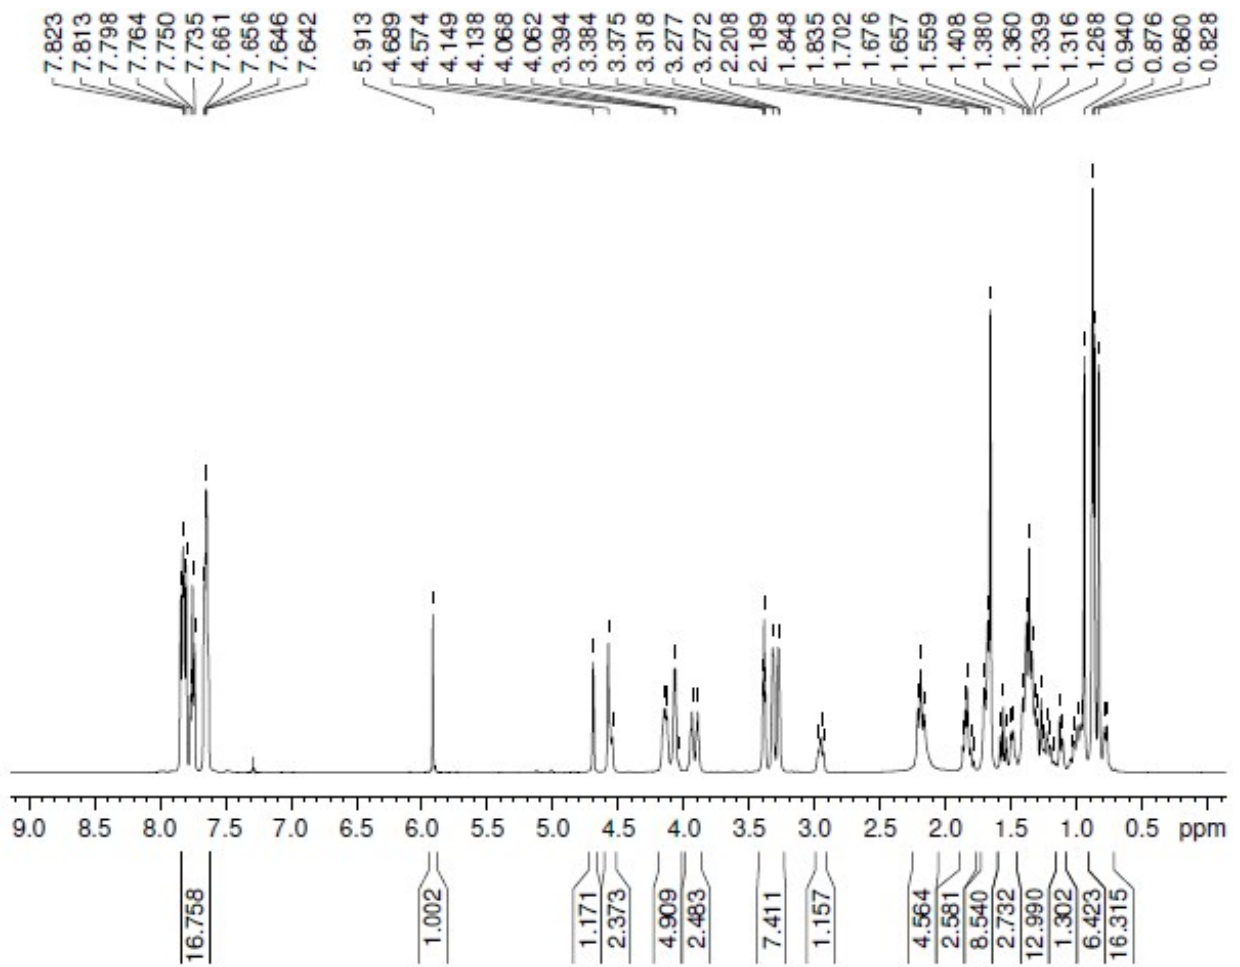

8'--(triphenylphosphonio-3',6'-dioxaoctan-1'-yl)-3 $\beta$ -dichloroacetoxylup-20(29)-en-28-oate bromide **10**  
<sup>13</sup>C NMR spectra (CDCl<sub>3</sub>)

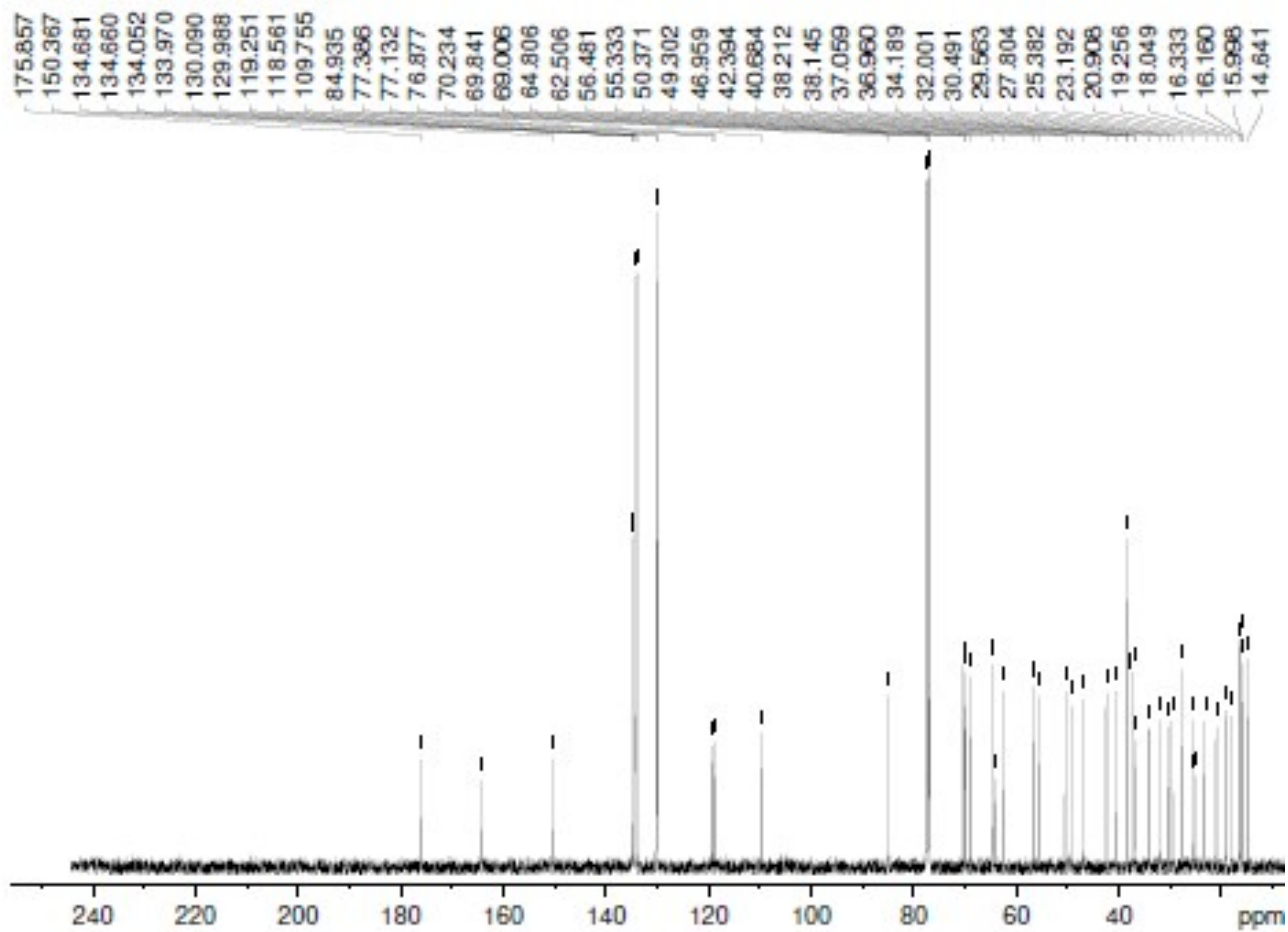

8<sup>1</sup>-(triphenylphosphonio-3',6'-dioxaoctan-1'-yl)-3 $\beta$ -dichloroacetylup-20(29)-en-28-oate bromide **10**  
<sup>31</sup>P NMR spectra (CDCl<sub>3</sub>)

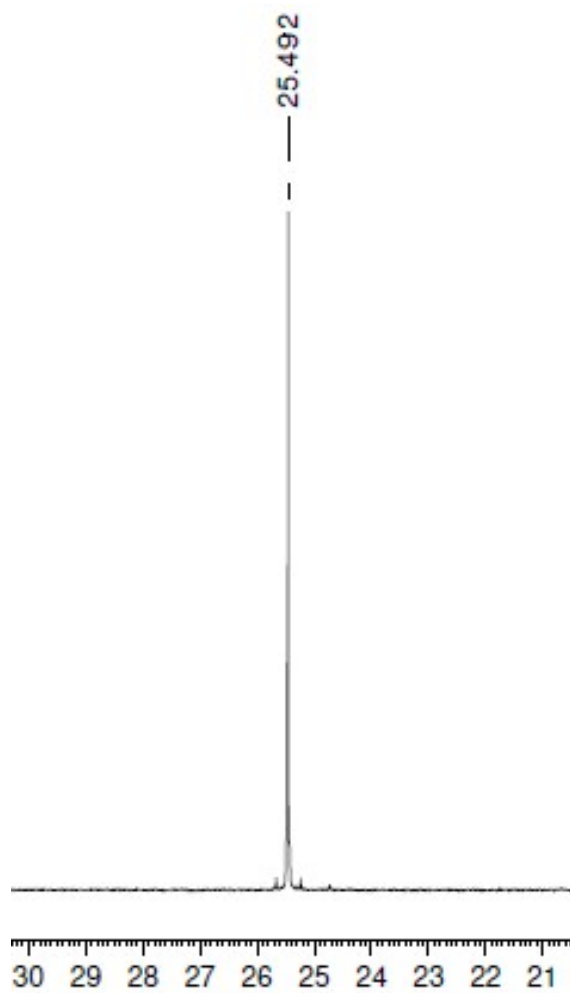

4'-(triphenylphosphonio)butyl-3 $\beta$ -dichloroacetoxyurs-12en-28-oate bromide **14**  
 $^1\text{H}$  NMR spectra ( $\text{CDCl}_3$ )

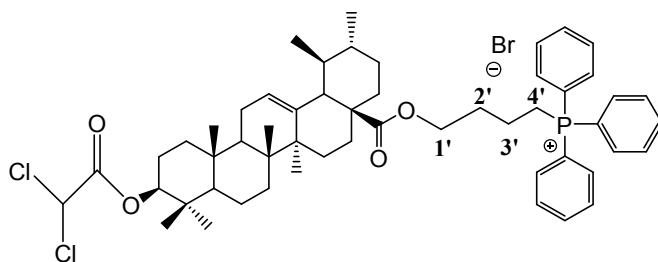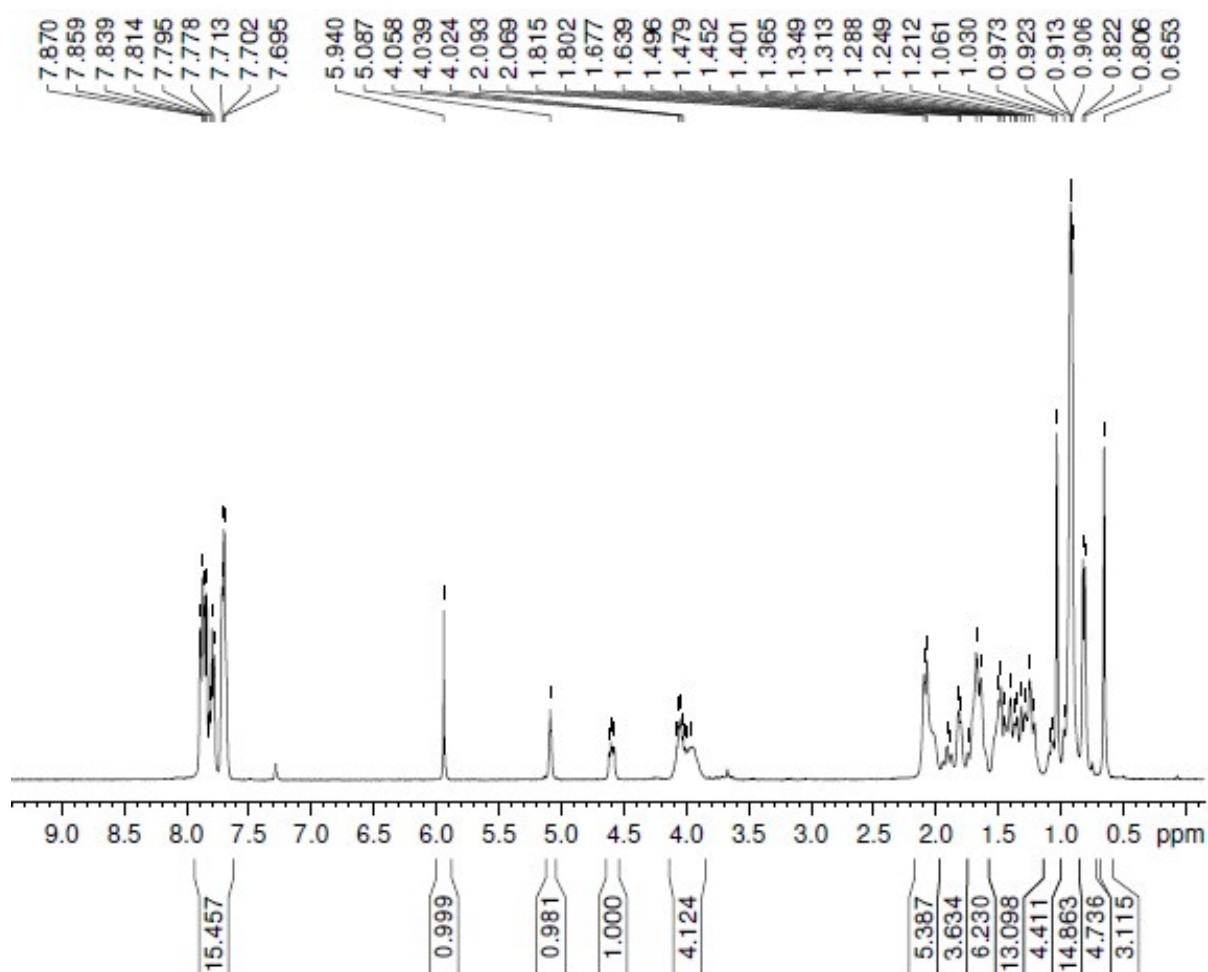

4'-(triphenylphosphonio)butyl-3 $\beta$ -dichloroacetoxyurs-12en-28-oate bromide **14**  
 $^{13}\text{C}$  NMR spectra ( $\text{CDCl}_3$ )

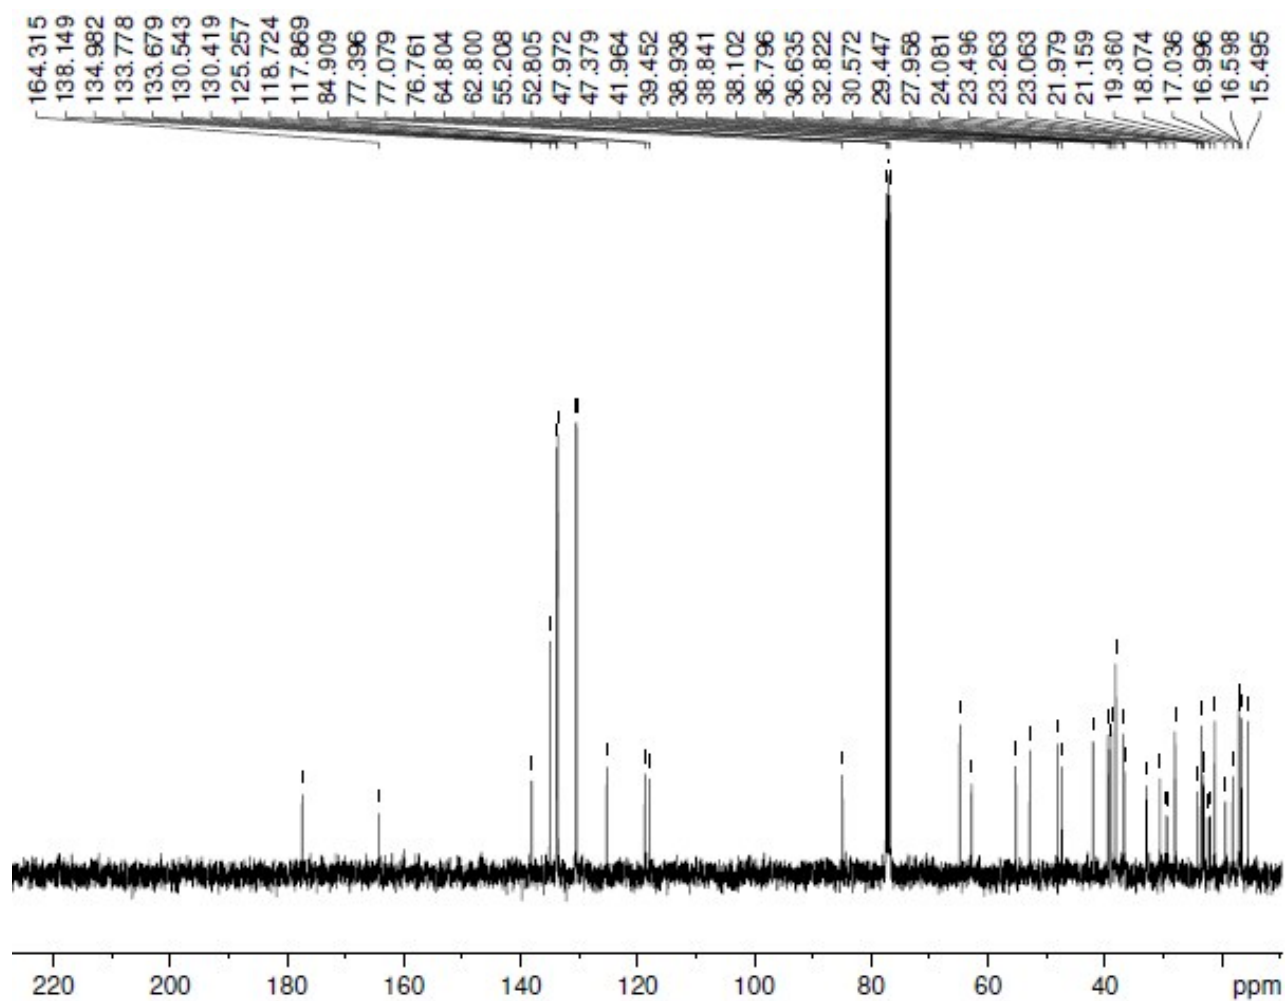

4'-(triphenylphosphonio)butyl-3 $\beta$ -dichloroacetoxyurs-12en-28-oate bromide **14**  
 $^{31}\text{P}$  NMR spectra ( $\text{CDCl}_3$ )

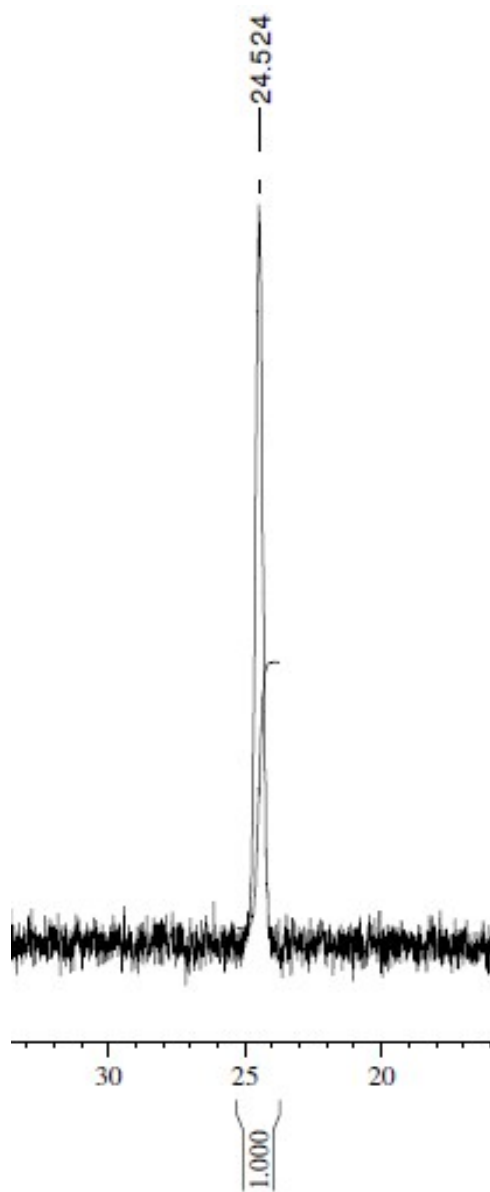

8'-(triphenylphosphonio-3',6'-dioxaoctan-1'-yl)-3 $\beta$ -dichloroacetoxyurs-12en-28-oate bromide **16**  
 $^1\text{H}$  NMR spectra ( $\text{CDCl}_3$ )

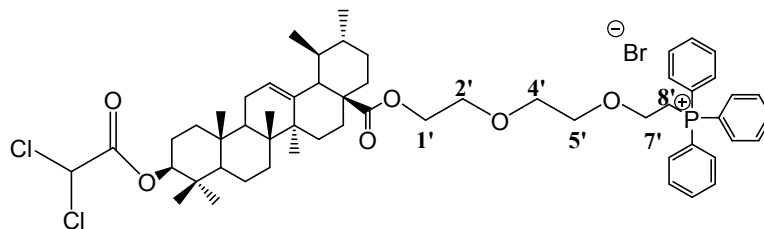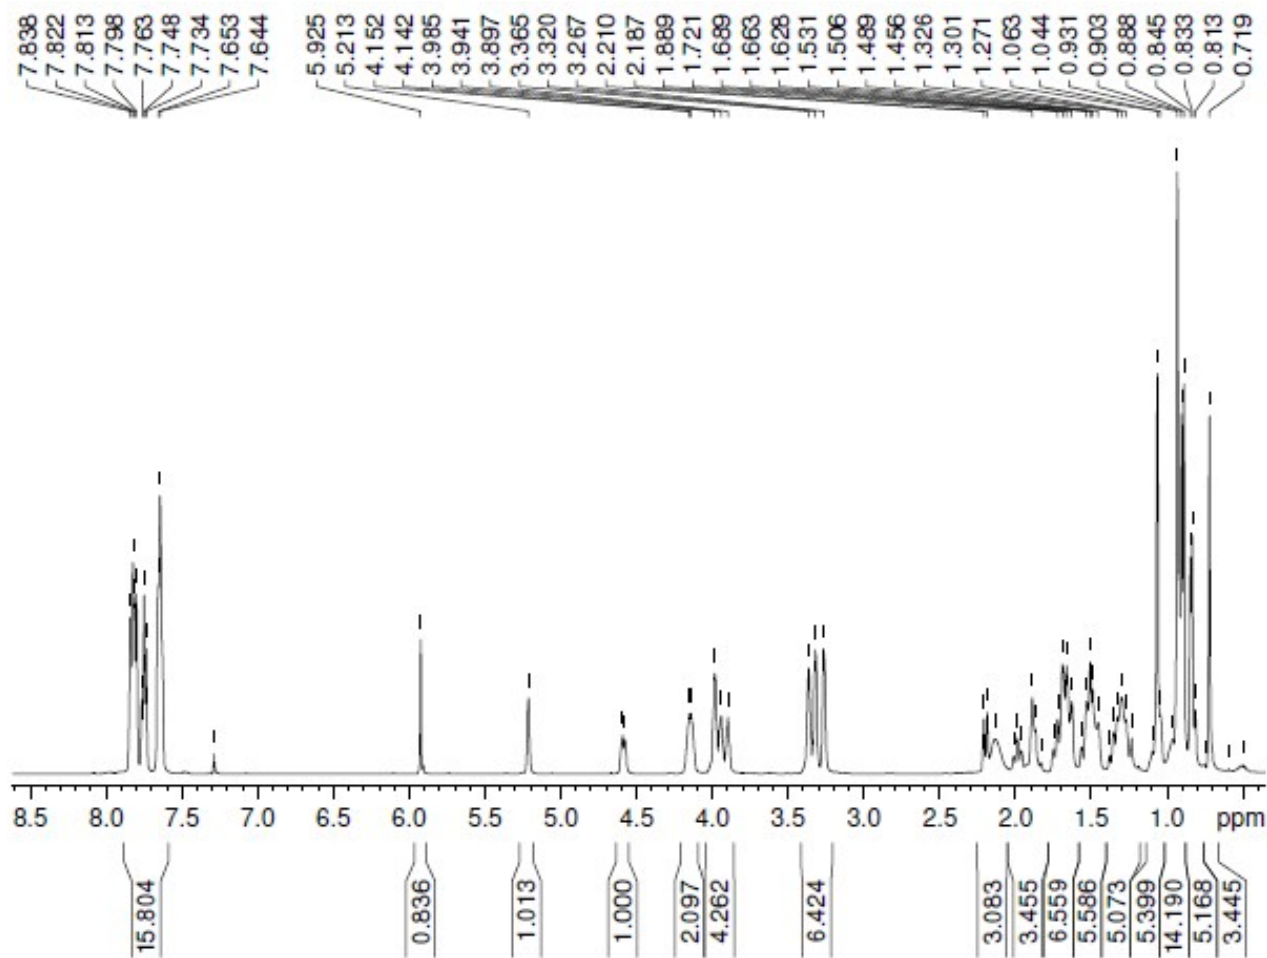



8'-(triphenylphosphonio-3',6'-dioxaoctan-1'-yl)-3 $\beta$ -dichloroacetoxyurs-12en-28-oate bromide **16**  
 $^{13}\text{C}$  NMR spectra ( $\text{CDCl}_3$ )

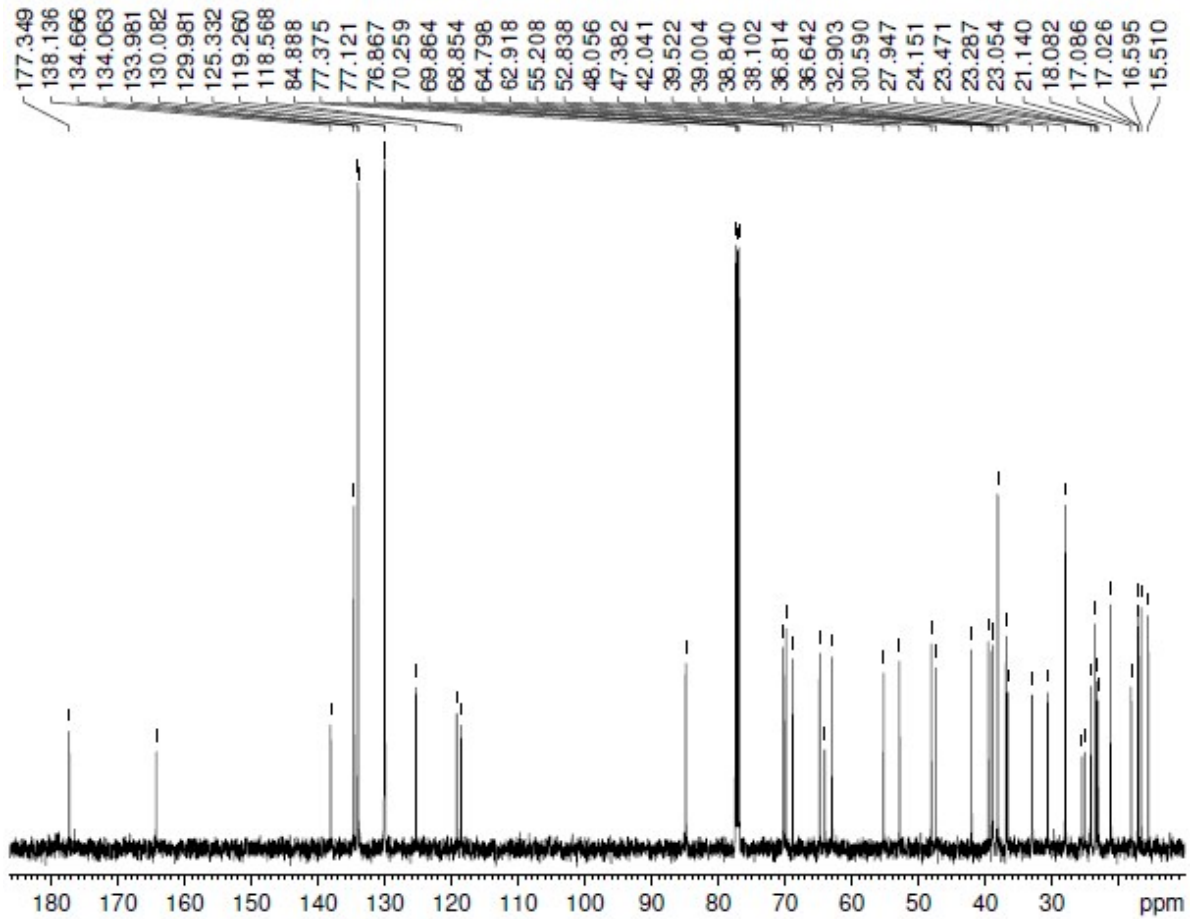

8'-(triphenylphosphonio-3',6'-dioxaoctan-1'-yl)-3 $\beta$ -dichloroacetoxyurs-12en-28-oate bromide **16**  
 $^{31}\text{P}$  NMR spectra ( $\text{CDCl}_3$ )

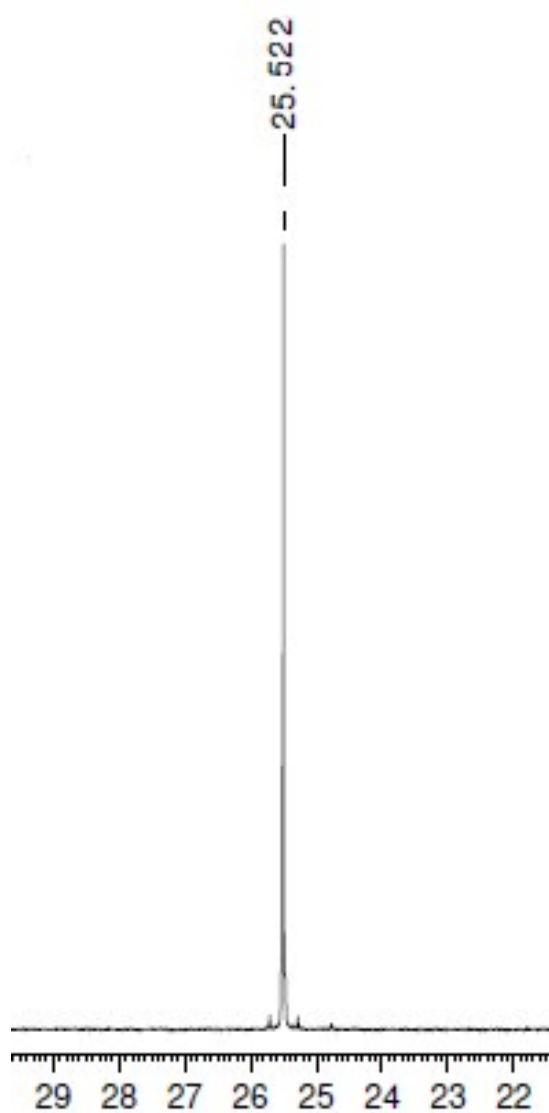

3 $\beta$ -dichloroacetoxyurs-12en-28-oic acid **UA-DCA**

$^1\text{H}$  NMR spectra ( $\text{CDCl}_3$ )

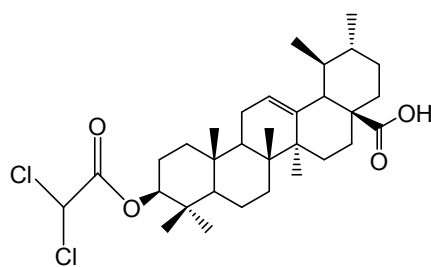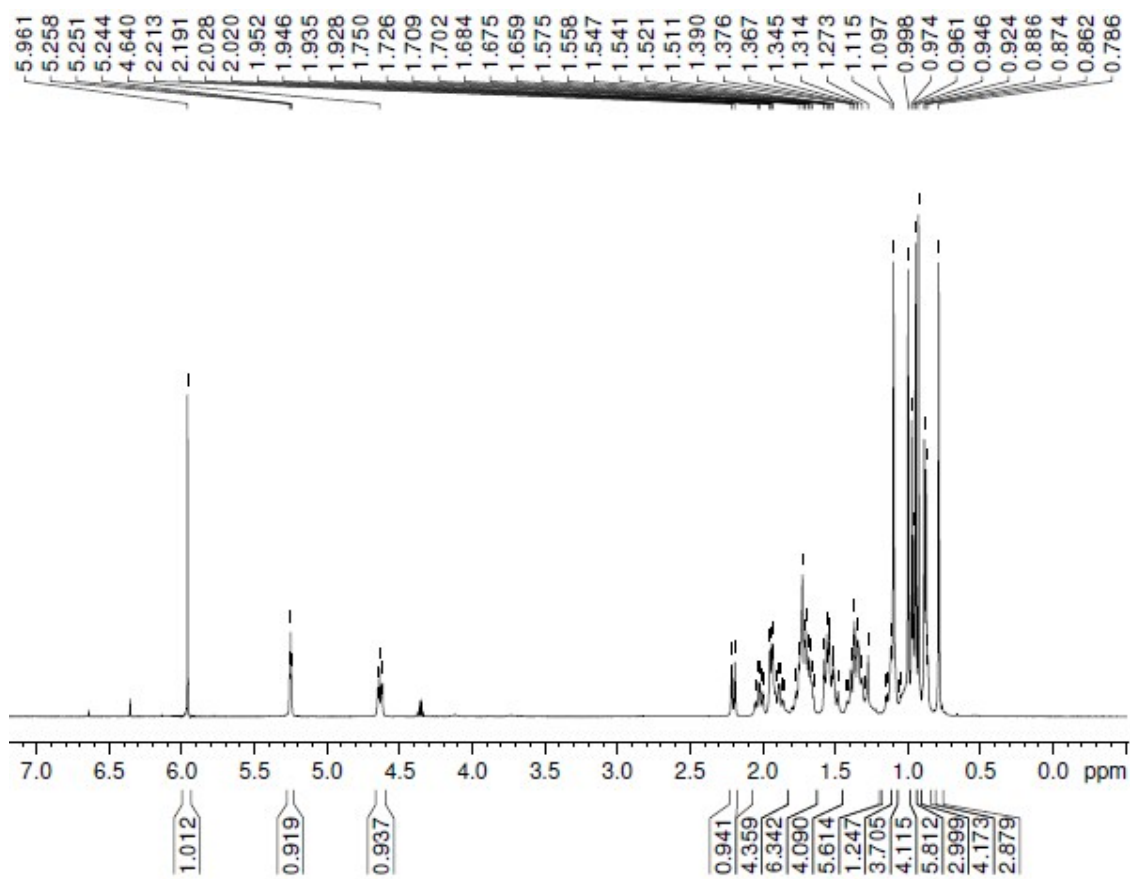

3 $\beta$ -dichloroacetoxyurs-12en-28-oic acid **UA-DCA**  
<sup>13</sup>C NMR spectra (CDCl<sub>3</sub>)

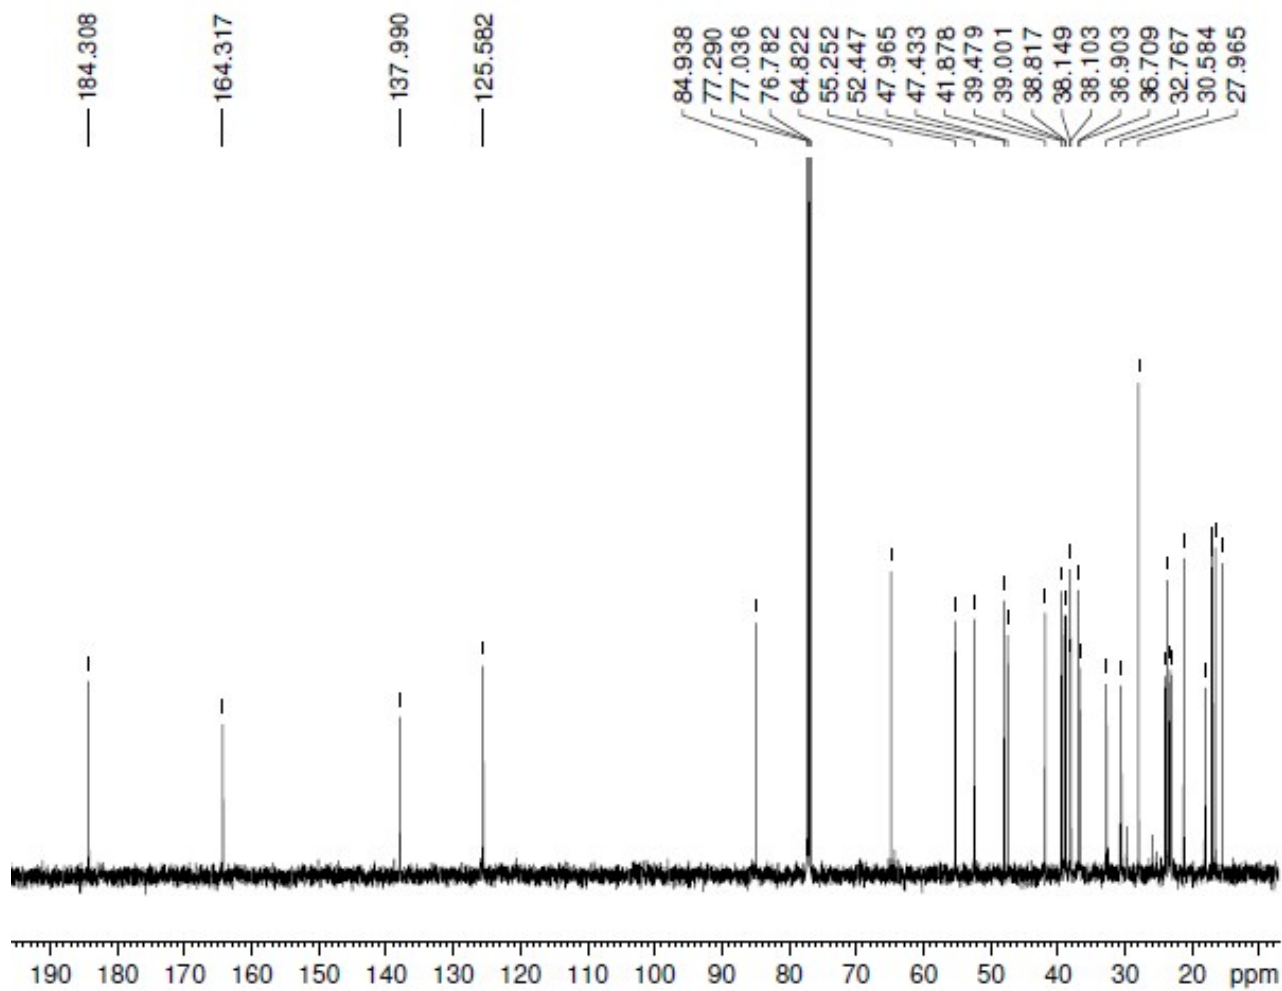

3 $\beta$ -dichloroacetylup-20(29)-en-28-oic acid **BA-DCA**  
 $^1\text{H}$  NMR spectra ( $\text{CDCl}_3$ )

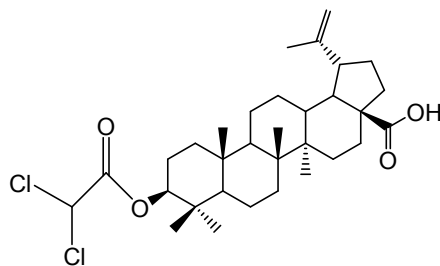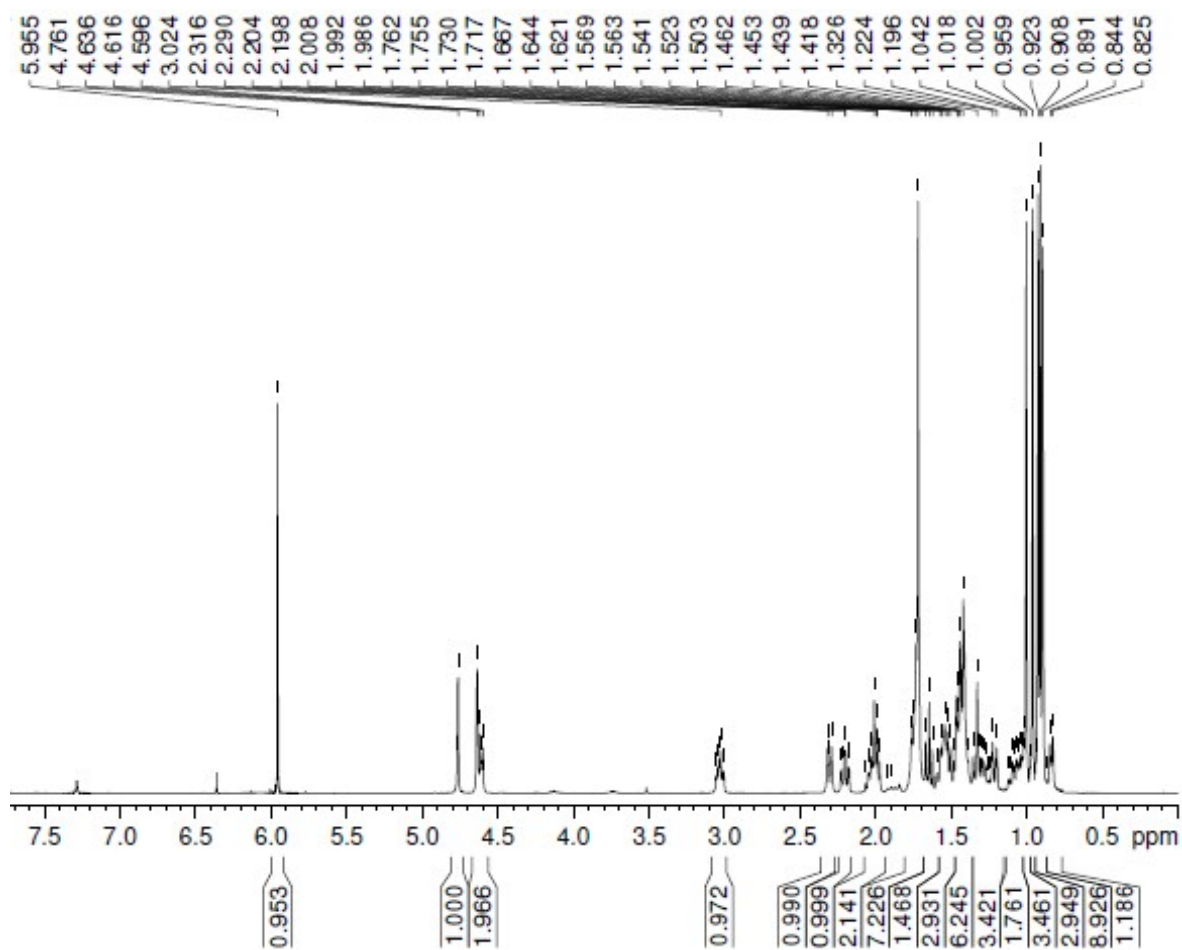

3 $\beta$ -dichloroacetylup-20(29)-en-28-oic acid **BA-DCA**  
<sup>13</sup>C NMR spectra (CDCl<sub>3</sub>)

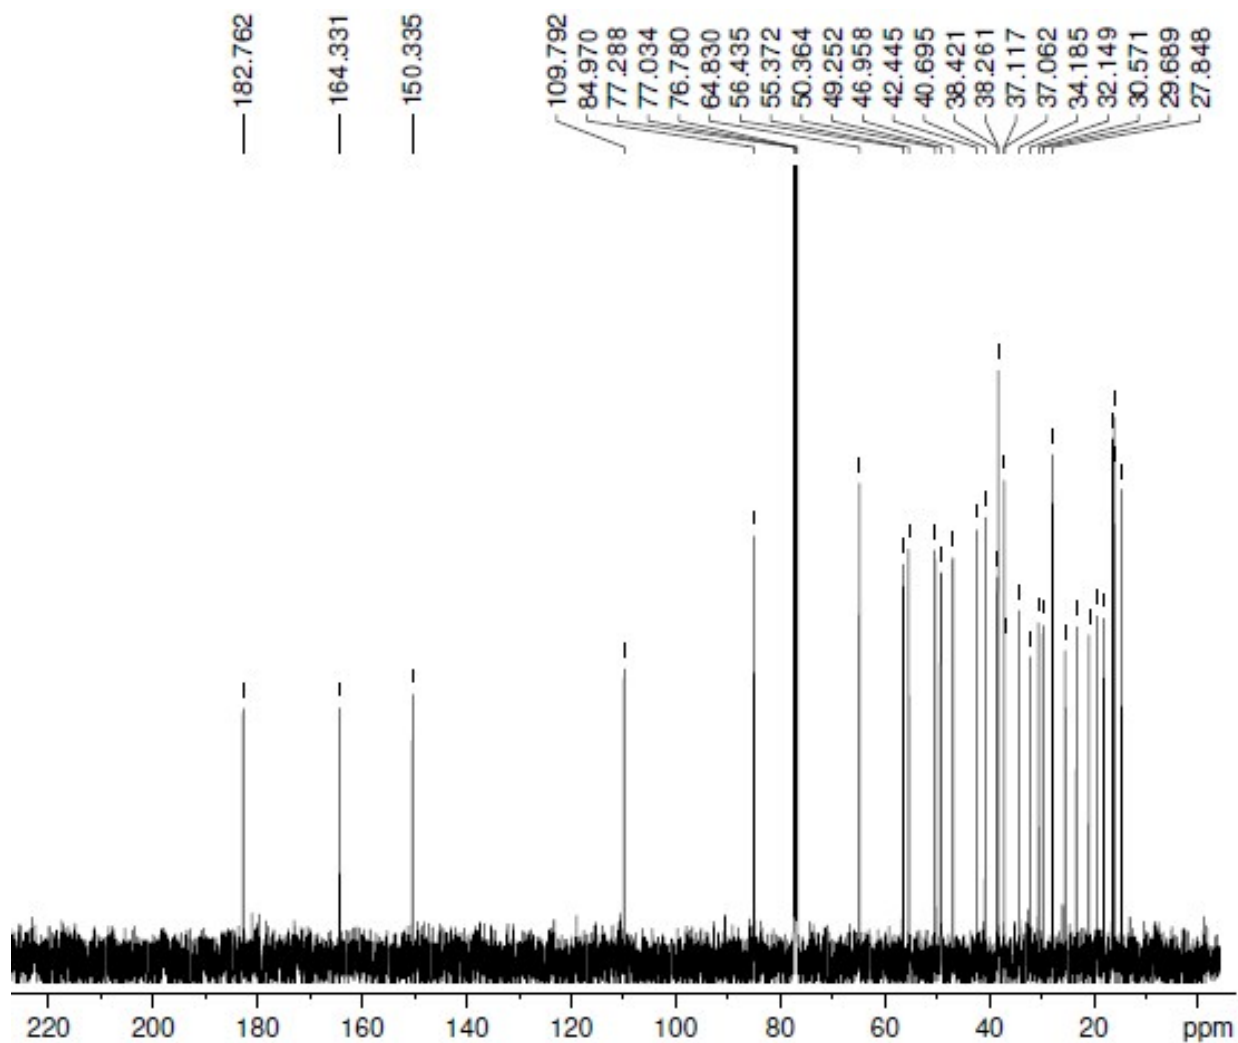

Supplement: MD-008-C7MD00248C-s001.pdf [file MD-008-C7MD00248C-s001.pdf]
